# Supplementary material for: Quantitative Proteomics Reveals that GmENO2 Proteins Are Involved in Response to Phosphate Starvation in the Leaves of Glycine max L
Source: MDPI journal article supplement (doi:10.3390/ijms22020920), 2021-01-18
Supplement: s1 [file Table S1Differential expressed proteins in soybean leaves under LP condition.xlsx]

## Sheet: Sheet1
Protein IDs	HP_1	HP_2	HP_3	LP_1	LP_2	LP_3	LOG2(Ratio LP/HP)	-LOG(P-value)	P value	Description
Glyma.09G153900.1.p	23.1262	22.6686	22.8567	29.7841	29.782	29.342	6.7522	5.35463	4.41949e-06	enolase(LOC100803925)
Glyma.11G247600.1.p	22.9354	22.9696	22.4143	28.799	28.9669	29.0509	6.16582	5.23057	5.8807e-06	glyceraldehyde-3-phosphate dehydrogenase, cytosolic-like(LOC100807342)
Glyma.19G212800.1.p	22.2804	23.6146	23.3246	28.9813	28.9576	29.0087	5.90933	3.88997	0.000128833	sucrose synthase 2(LOC100802045)
Glyma.02G156800.1.p	22.5017	23.1253	23.1473	28.6622	28.603	28.7594	5.75012	4.92285	1.1944e-05	lectin(LOC732576)
Glyma.04G017700.4.p	24.1243	23.3464	22.4854	28.4013	28.2479	28.4515	5.04817	3.34484	0.000452024	1,4-alpha-glucan-branching enzyme 1, chloroplastic/amyloplastic-like(LOC100792499)
Glyma.08G175200.1.p	25.3263	26.1448	22.719	29.5775	29.6933	29.6076	4.89611	2.04313	0.00905471	glutathione S-transferase(GST)
Glyma.18G249800.1.p	22.8679	22.4489	22.88	27.2954	27.3383	27.3454	4.59411	5.25725	5.53034e-06	subtilisin-like protease Glyma18g48580(LOC100811937)
Glyma.11G095100.1.p	23.5512	22.8425	23.5234	28.075	27.1056	27.7775	4.34699	3.5287	0.000296008	endo-1,3-beta-glucanase(LOC547748)
Glyma.18G009700.3.p	22.7781	22.7227	23.2269	27.2864	27.2862	27.085	4.30994	4.81034	1.54759e-05	glyceraldehyde-3-phosphate dehydrogenase, cytosolic-like(LOC100782924)
Glyma.03G131100.8.p	24.7904	23.5618	24.8669	28.8801	28.3121	28.8439	4.27232	3.12269	0.000753886	UDP-sulfoquinovose synthase, chloroplastic-like(LOC100805019)
Glyma.20G151500.1.p	24.0598	21.783	23.8647	27.5963	27.3177	27.3772	4.19457	2.33474	0.00462663	ATP sulfurylase 1, chloroplastic(LOC100817530)
Glyma.07G266200.1.p	23.2693	22.5972	22.6246	26.7861	26.9095	27.0443	4.0829	4.21362	6.11473e-05	inositol monophosphatase 3-like(LOC100790820)
Glyma.01G095232.1.p	22.8021	23.7266	23.011	27.5616	26.8984	26.8642	3.92816	3.39551	0.000402242
Glyma.11G239400.1.p	22.3503	21.4844	23.1299	26.5796	25.881	26.2744	3.92346	2.79295	0.00161084	uncharacterized LOC100793024(LOC100793024)
Glyma.07G049900.2.p	22.8022	23.0328	26.681	27.6646	28.3182	28.2168	3.8945	1.4243	0.0376445	granule-bound starch synthase(LOC100037476)
Glyma.08G179600.1.p	23.0412	24.9467	24.1103	28.3746	27.7757	27.6183	3.89014	2.5414	0.00287478	cationic peroxidase 2-like(LOC100789249)
Glyma.05G003900.1.p	23.9154	22.4244	22.9981	27.1556	26.8776	26.8834	3.85955	3.01667	0.00096234	galactinol--sucrose galactosyltransferase(LOC100790775)
Glyma.15G251500.1.p	25.6013	23.5	25.7722	28.6406	28.5013	28.5662	3.61153	2.10565	0.00784054	glutathione transferase(LOC547936)
Glyma.15G062400.1.p	22.0095	22.341	22.6522	25.7539	25.8601	25.872	3.49448	4.29488	5.07125e-05	pathogenesis-related protein 1-like(LOC100805116)
Glyma.15G115500.1.p	23.8347	23.2149	22.2766	26.3864	26.5141	26.4612	3.34517	2.74136	0.00181401	inositol monophosphatase 3-like(LOC100817591)
Glyma.07G205400.1.p	23.0224	23.2569	22.9901	26.3121	26.0561	26.1199	3.0729	4.9493	1.12384e-05	ervatamin-B-like(LOC100803704)
Glyma.03G078300.1.p	22.7318	21.9261	22.8838	25.6597	25.5375	25.498	3.05118	3.27249	0.000533957	sulfoquinovosyl transferase SQD2(LOC100803792)
Glyma.01G142400.1.p	25.8064	26.0202	26.3136	28.7455	29.3644	29.134	3.03457	3.69866	0.000200143	ruBisCO-associated protein(LOC547969)
Glyma.16G082100.1.p	25.7572	23.4304	22.9131	26.7441	27.0913	27.0185	2.91773	1.52864	0.0296047
Glyma.08G200100.1.p	26.5689	26.9148	26.4193	29.6477	29.3741	29.6274	2.91539	4.15751	6.95804e-05	31 kDa protein(LOC547820)
Glyma.15G021400.1.p	22.2103	23.3085	23.525	25.7934	26.0714	25.8155	2.87883	2.63801	0.00230137	stress-induced receptor-like kinase 2(SIK2)
Glyma.09G134500.1.p	24.7127	23.6959	24.8941	27.4141	27.0903	27.3636	2.85513	2.7483	0.00178525	protein SRC2 homolog(LOC100817630)
Glyma.01G160100.1.p	24.8355	24.7425	22.2513	26.7708	26.6733	26.8323	2.81568	1.53276	0.0293252	endochitinase-like(LOC100799642)
Glyma.15G062700.1.p	28.6683	28.512	28.7059	31.2913	31.1957	31.4121	2.67098	5.18764	6.49166e-06	pathogenesis-related protein 1-like(LOC100807250)
Glyma.10G086600.4.p	25.2821	25.0057	22.5602	26.6546	26.9181	26.967	2.56389	1.37526	0.0421445	sucrose-phosphatase 1(LOC100800397)
Glyma.13G268000.1.p	22.0674	25.0861	23.2417	26.0069	26.1523	25.9276	2.56385	1.35976	0.0436757	gamma-glutamyl hydrolase 2-like(LOC100796947)
Glyma.12G193500.1.p	23.508	24.7507	22.7696	26.2089	26.2461	26.2316	2.55278	1.93737	0.0115512	2-alkenal reductase (NADP(+)-dependent)-like(LOC100793405)
Glyma.03G226300.2.p	22.6396	22.9253	22.5902	25.0201	25.0144	25.6523	2.51055	3.35412	0.00044247	cathepsin B(LOC100778103)
Glyma.09G262000.1.p	23.7026	23.588	23.3901	26.0807	26.1743	25.8233	2.4659	4.2257	5.94697e-05	K(+) efflux antiporter 2, chloroplastic-like(LOC100818163)
Glyma.19G098500.1.p	22.7871	23.1349	22.4098	25.2744	25.3253	25.1092	2.45905	3.44349	0.000360168	glycerophosphodiester phosphodiesterase GDPD1, chloroplastic-like(LOC100807698)
Glyma.18G067200.1.p	22.9566	22.6623	22.5728	25.3873	24.8361	25.2183	2.41668	3.56986	0.00026924	alpha-glucan phosphorylase, H isozyme(LOC100807501)
Glyma.08G174700.1.p	25.32	26.314	26.5151	28.6223	28.233	28.4771	2.39444	2.46194	0.00345193	glutathione S-transferase GST 9(LOC547950)
Glyma.09G011100.1.p	25.597	22.8828	25.6481	26.8856	27.3328	27.0845	2.3917	1.21816	0.0605122	inositol monophosphatase 3-like(LOC100799849)
Glyma.18G006700.2.p	23.2291	23.3443	23.5154	25.1669	25.5369	26.4174	2.34416	2.45476	0.00350943	REF/SRPP-like protein At1g67360(LOC100816931)
Glyma.16G145300.1.p	25.4369	23.0718	25.2867	27.0328	26.6486	27.0387	2.30824	1.38867	0.0408629	serine carboxypeptidase-like 27(LOC100796815)
Glyma.07G073700.3.p	23.4217	23.2568	24.0333	25.9266	25.4157	26.1457	2.25874	2.67143	0.00213091	K(+) efflux antiporter 2, chloroplastic-like(LOC100791174)
Glyma.06G275700.1.p	22.8834	22.7524	22.3226	24.8639	24.9203	24.794	2.20661	3.65943	0.000219064	aspartate aminotransferase, mitochondrial(LOC547813)
Glyma.07G014500.1.p	30.9272	31.0719	30.7511	33.1733	32.9561	33.1581	2.17914	4.32225	4.76162e-05	28 kDa protein(VSPA)
Glyma.05G138400.1.p	22.9275	22.9047	22.8675	25.334	24.9185	24.8824	2.14509	3.90431	0.00012465	purple acid phosphatase 8-like(LOC100818610)
Glyma.01G173300.1.p	25.8692	25.9327	24.5983	27.7428	27.3722	27.7158	2.14352	2.04918	0.00892931	putative glucose-6-phosphate 1-epimerase(LOC100797902)
Glyma.02G138100.1.p	25.5242	22.8244	25.3644	26.4696	26.8077	26.8434	2.13588	1.13812	0.0727586	stearoyl-acyl carrier protein desaturase(ACPD)
Glyma.01G004200.5.p	23.5437	23.9146	23.3767	25.6237	25.8631	25.6382	2.09664	3.53778	0.000289879	probable caffeoyl-CoA O-methyltransferase At4g26220(LOC100800911)
Glyma.20G241600.2.p	23.0152	23.1463	23.3281	25.3289	25.2073	25.1895	2.07869	4.48721	3.25676e-05	chalcone isomerase 1B1(CHI1B1)
Glyma.02G208400.1.p	22.4043	23.263	22.7605	24.9207	24.8847	24.8443	2.07392	2.93779	0.001154	phospho-2-dehydro-3-deoxyheptonate aldolase 1, chloroplastic-like(LOC100797019)
Glyma.18G003100.1.p	22.9369	25.693	22.831	25.9457	25.6792	25.9867	2.05022	1.02195	0.0950715	crocetin glucosyltransferase, chloroplastic-like(LOC100800222)
Glyma.01G219400.1.p	22.3347	22.5176	23.7617	24.9212	25.0363	24.7998	2.04777	1.9709	0.0106929	uncharacterized LOC100306570(LOC100306570)
Glyma.03G172700.4.p	25.8216	25.4438	22.625	26.4783	26.8727	26.6326	2.03106	0.935632	0.115976	uncharacterized LOC100500040(LOC100500040)
Glyma.12G173200.4.p	26.3709	26.8955	27.0423	28.7773	28.8046	28.731	2.00144	3.21075	0.000615532	4-hydroxy-3-methylbut-2-en-1-yl diphosphate synthase (ferredoxin), chloroplastic(LOC100819481)
Glyma.16G211700.1.p	27.2035	26.9891	27.3887	29.3732	29.0567	29.1124	1.98702	3.71364	0.000193358	Kunitz trypsin protease inhibitor-like(LOC100170690)
Glyma.08G316200.1.p	22.8242	23.0974	24.5407	25.3338	25.403	25.6834	1.98595	1.6646	0.0216472	reactive Intermediate Deaminase A, chloroplastic-like(LOC100785544)
Glyma.14G023700.2.p	22.3547	22.4643	23.5545	24.9825	24.7142	24.6335	1.98558	2.12499	0.00749904	uncharacterized LOC100499809(LOC100499809)
Glyma.10G047700.1.p	22.4356	25.2665	25.8185	26.2011	26.5153	26.5443	1.91337	0.843076	0.143524	glutathione S-transferase L3(LOC100817305)
Glyma.09G285700.1.p	23.1992	23.5057	23.1002	25.1731	25.3414	25.0148	1.90809	3.61014	0.000245394	uncharacterized LOC100806152(LOC100806152)
Glyma.10G151800.1.p	22.2572	23.3917	23.9306	25.248	24.916	25.1047	1.89636	1.70925	0.0195321	uncharacterized LOC100305730(LOC100305730)
Glyma.09G155500.1.p	26.8023	26.2799	26.5166	28.193	28.4102	28.5125	1.83898	3.3051	0.000495341	trypsin inhibitor(LOC548021)
Glyma.17G045800.1.p	22.8666	22.9125	24.7613	25.5655	25.3122	25.17	1.83579	1.3521	0.0444532	sucrose synthase(LOC100788584)
Glyma.18G287800.1.p	22.3301	24.5742	22.7358	24.9893	24.9741	25.1411	1.82147	1.23538	0.0581596
Glyma.01G202000.3.p	23.0686	22.369	22.1068	24.7609	23.8525	24.2228	1.76392	1.97407	0.0106153	phosphatase YqaB-like(LOC100793483)
Glyma.06G116200.1.p	27.7121	27.7409	27.9273	29.5073	29.5922	29.4756	1.73158	4.66014	2.18705e-05	uncharacterized LOC100791865(LOC100791865)
Glyma.08G200200.1.p	29.0289	29.4575	29.2923	30.9389	31.0474	30.9662	1.72459	3.74231	0.000181003
Glyma.07G048900.1.p	23.57	23.1988	23.5485	24.94	25.1901	25.2504	1.68774	3.4122	0.00038708	anthranilate N-methyltransferase(LOC100789402)
Glyma.13G057800.2.p	22.4123	24.8539	24.0225	25.4777	25.3205	25.5303	1.67994	1.09797	0.0798046	alpha-1,4 glucan phosphorylase L isozyme, chloroplastic/amyloplastic(LOC100800659)
Glyma.06G044600.1.p	22.7793	22.3687	24.3235	25.0961	24.4363	24.8999	1.65357	1.23958	0.0575992	3-oxo-Delta(4,5)-steroid 5-beta-reductase(LOC100813467)
Glyma.13G267851.1.p	31.2379	31.1627	31.1642	32.9359	32.7741	32.7878	1.64434	5.0523	8.86546e-06
Glyma.08G223300.1.p	24.3285	24.2726	24.0144	25.6875	25.5804	26.2792	1.64388	2.63834	0.00229962	D-3-phosphoglycerate dehydrogenase 2, chloroplastic-like(LOC100817949)
Glyma.18G125500.1.p	26.8311	27.1472	27.194	28.6246	28.7709	28.6315	1.61823	3.70756	0.000196083	mitochondrial outer membrane protein porin of 36 kDa-like(LOC100805016)
Glyma.14G005700.1.p	22.64	23.8614	23.422	24.8033	24.7257	25.1763	1.59397	1.84886	0.0141625	NAD(P)H dependent 6'-deoxychalcone synthase(REDUCTASE)
Glyma.08G094600.2.p	22.208	23.525	22.2674	24.4459	24.094	24.2116	1.58372	1.6372	0.0230571	L-Ala-D/L-amino acid epimerase(LOC100793110)
Glyma.03G066800.1.p	24.7118	24.5721	24.5656	25.8139	26.2988	26.3012	1.52144	3.07518	0.00084104	aldo-keto reductase family 4 member C9(LOC100792657)
Glyma.18G055300.1.p	24.3861	22.8562	24.3009	25.362	25.2621	25.4761	1.51898	1.41421	0.038529	peroxidase 4-like(LOC100813384)
Glyma.06G015800.1.p	23.6091	25.8515	25.7504	26.7774	26.3773	26.6043	1.516	0.958726	0.10997	uncharacterized LOC100527765(LOC100527765)
Glyma.06G139200.2.p	24.5753	22.2844	23.1207	25.0221	24.6164	24.8242	1.4941	1.03264	0.0927608	mitochondrial import inner membrane translocase subunit TIM22(LOC100813121)
Glyma.17G078900.2.p	22.2179	23.6222	23.2164	24.2838	24.6225	24.6307	1.49353	1.58506	0.0259982	glycerophosphodiester phosphodiesterase GDPD6(LOC100800181)
Glyma.04G184300.1.p	24.0595	23.1712	22.9313	24.7015	25.0571	24.8762	1.49094	1.85028	0.0141163	plastid phosphoenolpyruvate/phosphate translocator-like(LOC732612)
Glyma.12G021300.1.p	26.0447	26.2148	26.4899	27.7303	28.0508	27.4019	1.47789	2.53553	0.00291388	glucan endo-1,3-beta-glucosidase(LOC100775292)
Glyma.18G071500.1.p	23.1249	24.7205	22.0517	24.9901	24.7125	24.5861	1.46387	0.868249	0.135441	proteasome activator subunit 4-like(LOC100814812)
Glyma.06G170300.1.p	27.2028	27.1993	27.0324	28.7281	28.6036	28.4938	1.4637	4.11656	7.64612e-05	probable inactive purple acid phosphatase 27-like(LOC100775672)
Glyma.04G012300.1.p	28.6185	28.6602	28.3353	30.0272	29.8882	30.0593	1.45361	3.65029	0.000223722	isoflavone reductase homolog 2(IFR2)
Glyma.19G245400.1.p	24.3111	24.455	24.217	25.7347	25.6555	25.8619	1.42299	3.99759	0.000100557	pro-hevein(LOC548085)
Glyma.13G056100.1.p	24.6793	23.08	24.1146	25.1224	25.4654	25.5425	1.41882	1.36451	0.0432006	malonyl-CoA:isoflavone 7-O-glucoside-6''-O-malonyltransferase(IF7MaT)
Glyma.15G054700.1.p	24.8013	24.6529	24.9759	26.4105	26.1523	26.0989	1.41051	3.33621	0.000461093	phospho-2-dehydro-3-deoxyheptonate aldolase 2, chloroplastic(LOC100789764)
Glyma.06G144100.1.p	24.0473	24.632	22.8374	25.1933	25.4174	25.1287	1.40759	1.23425	0.0583112	alpha-galactosidase 3(LOC100784072)
Glyma.02G091300.3.p	23.4163	22.931	25.0326	25.4234	24.9526	25.1416	1.37923	0.995397	0.101066	phenylalanine--tRNA ligase, chloroplastic/mitochondrial(LOC100779145)
Glyma.07G059300.1.p	23.1469	23.0135	22.5805	23.9595	24.3983	24.4914	1.36945	2.35177	0.00444868	ribonuclease 2(LOC100815624)
Glyma.15G038100.1.p	27.2936	26.9933	26.9109	28.0572	28.4213	28.7975	1.35939	2.29812	0.00503366	triosephosphate isomerase, cytosolic(LOC100796274)
Glyma.16G018500.5.p	30.3194	30.3086	30.4555	31.5147	31.817	31.7599	1.33606	3.67278	0.00021243	granule-bound starch synthase 1, chloroplastic/amyloplastic(LOC100817424)
Glyma.14G210700.1.p	29.0886	29.2556	29.1768	30.4472	30.5697	30.4992	1.3317	4.61597	2.4212e-05	UTP--glucose-1-phosphate uridylyltransferase(LOC100790112)
Glyma.17G243600.1.p	24.3877	24.3612	22.2667	25.1293	25.0393	24.7718	1.30829	0.85544	0.139495	uncharacterized LOC100527337(LOC100527337)
Glyma.10G061000.1.p	25.5715	25.5559	25.6078	26.7521	26.9063	26.803	1.2421	4.88188	1.31256e-05	thaumatin-like protein 1b(LOC100816057)
Glyma.07G115500.1.p	24.6729	24.9933	24.2963	26.109	25.9648	25.5887	1.23337	2.07941	0.00832901	patatin group A-3-like(LOC100802114)
Glyma.07G045900.1.p	26.0765	26.1326	25.9727	27.4055	27.336	27.0817	1.21381	3.43172	0.000370063	alanine aminotransferase 2-like(LOC100776235)
Glyma.08G285900.1.p	26.5705	26.6022	26.7492	27.7013	27.7925	28.0406	1.20421	3.32248	0.0004759	probable nucleoredoxin 1(LOC100809224)
Glyma.19G192800.2.p	28.48	28.4067	28.1103	29.4954	29.6246	29.3764	1.16644	3.02035	0.000954215	1,4-alpha-glucan-branching enzyme 1, chloroplastic/amyloplastic-like(LOC100785968)
Glyma.19G174300.1.p	22.8365	23.4357	24.0713	24.4942	24.5713	24.7632	1.1617	1.47431	0.0335495	diaminopimelate epimerase, chloroplastic-like(LOC100784731)
Glyma.07G019100.2.p	22.5382	22.7811	24.0382	24.1853	24.4561	24.1858	1.15657	1.14872	0.0710033	malonate--CoA ligase-like(LOC100813324)
Glyma.10G261200.2.p	28.6994	28.894	28.7349	29.6724	29.9883	30.0813	1.13791	2.93461	0.00116248	uncharacterized LOC100527902(LOC100527902)
Glyma.04G021400.1.p	27.2259	27.272	26.9585	28.2018	28.2868	28.3268	1.11964	3.36708	0.000429461	uncharacterized LOC100500267(LOC100500267)
Glyma.10G090500.3.p	23.3163	24.5493	24.2246	24.9917	25.3947	24.9874	1.09453	1.30512	0.0495316	S-adenosyl-L-methionine:delta24-sterol-C-methyltransferase(LOC548073)
Glyma.16G043400.1.p	25.6675	25.1668	25.4678	26.4967	26.437	26.6255	1.08573	2.65211	0.0022279
Glyma.13G161900.2.p	25.4417	25.1699	25.2092	26.0504	26.6414	26.3856	1.08558	2.32528	0.00472847	bifunctional purple acid phosphatase 26-like(PHYTASE)
Glyma.01G132500.1.p	27.2657	27.9692	27.7322	28.649	28.7962	28.7513	1.07648	2.15518	0.00699553
Glyma.12G024700.1.p	29.6343	29.4981	29.6618	30.6054	30.7938	30.6184	1.07447	3.76973	0.00016993	peptidyl-prolyl cis-trans isomerase 1-like(LOC106795232)
Glyma.10G205500.1.p	28.3118	28.3199	28.152	29.4389	29.2334	29.3282	1.07227	3.73148	0.000185576	phosphoenolpyruvate carboxylase(PEPC17)
Glyma.13G183200.1.p	23.8374	23.9326	22.8258	24.2585	24.8168	24.7355	1.07168	1.27384	0.0532309	polyphenol oxidase A1, chloroplastic-like(LOC100798709)
Glyma.08G044100.1.p	28.6132	28.6214	28.556	29.7188	29.6717	29.6113	1.07044	5.05701	8.76976e-06	phosphoglucomutase, cytoplasmic-like(LOC100780166)
Glyma.12G222200.1.p	25.7174	25.4338	25.9359	26.7641	26.8317	26.6291	1.04591	2.57806	0.00264205	protochlorophyllide reductase, chloroplastic(LOC100785637)
Glyma.08G334000.1.p	27.8807	28.0128	27.9496	29.0714	28.9451	28.9321	1.03521	4.22106	6.01097e-05	alpha-glucan phosphorylase, H isozyme(LOC100789789)
Glyma.02G298500.1.p	22.8979	23.9702	22.9317	24.5637	24.2869	24.0472	1.03265	1.26752	0.0540103
Glyma.01G127200.1.p	25.4141	25.5629	25.5567	26.8152	26.8359	25.9508	1.02274	1.58767	0.025842	dirigent protein 22-like(LOC100807466)
Glyma.16G077800.1.p	29.3873	29.5013	29.331	30.4757	30.3749	30.3753	1.00211	4.11537	7.66713e-05	NADP-dependent malic enzyme-like(LOC100784112)
Glyma.20G241700.1.p	24.1936	24.1046	24.4596	25.4591	25.1897	25.1042	0.998407	2.56663	0.00271247	chalcone isomerase 2(CHI2-A)
Glyma.12G122900.1.p	25.7449	26.1499	26.1836	27.5191	27.0261	26.5144	0.993746	1.43325	0.0368762	ketol-acid reductoisomerase, chloroplastic(LOC100789879)
Glyma.09G270500.4.p	28.6824	28.7749	28.3376	29.7621	29.4056	29.5971	0.990028	2.37971	0.00417147	2,3-bisphosphoglycerate-independent phosphoglycerate mutase-like(LOC100794734)
Glyma.07G115900.1.p	29.7142	29.707	29.6773	30.7484	30.6041	30.7058	0.986574	4.61982	2.39985e-05	nucleoside diphosphate kinase(LOC547709)
Glyma.02G215700.1.p	28.3424	28.2584	28.0864	29.6866	29.0165	28.9127	0.976222	1.73526	0.0183969	metalloproteinase(SMEP1)
Glyma.14G038200.1.p	26.4709	26.1114	26.7509	27.3271	27.2469	27.6284	0.956411	1.92451	0.0118985	multicystatin(LOC548091)
Glyma.11G070600.1.p	24.7855	23.5217	24.6513	25.4009	24.9249	25.4808	0.949371	1.02048	0.0953943	isoflavone reductase-like(LOC100781863)
Glyma.09G010000.3.p	26.8905	26.8601	26.9875	27.9369	27.7146	27.8941	0.935839	3.55425	0.000279095	fumarylacetoacetase-like(LOC100817986)
Glyma.19G082300.5.p	24.6876	24.4814	24.8692	25.5091	25.7563	25.5457	0.924282	2.61161	0.00244564	glucose-6-phosphate 1-dehydrogenase, cytoplasmic isoform-like(LOC100817852)
Glyma.09G173200.1.p	25.0501	25.2274	24.3106	26.0608	25.8056	25.4614	0.913214	1.29642	0.0505331	cytosolic glutamine synthetase alpha(GS1alpha)
Glyma.13G088700.1.p	25.4249	25.7988	25.2889	26.3112	26.4554	26.4701	0.907982	2.31635	0.00482666	annexin D1-like(ANNEXIN)
Glyma.13G336200.2.p	30.088	30.3035	30.0666	31.0135	31.0746	31.0711	0.90034	3.48878	0.000324505
Glyma.06G172700.1.p	27.7786	27.6573	27.7988	28.7002	28.4532	28.7232	0.880643	3.08747	0.000817586	glyceraldehyde-3-phosphate dehydrogenase, cytosolic(LOC100783902)
Glyma.08G055600.1.p	23.0744	22.9219	23.3386	23.6787	24.2854	23.9976	0.875583	1.82969	0.0148018	TPR repeat-containing thioredoxin TDX(LOC100789778)
Glyma.06G229900.3.p	28.7304	28.7443	28.773	29.6994	29.6289	29.5361	0.872204	4.23535	5.81638e-05	phosphoenolpyruvate carboxylase, housekeeping isozyme-like(LOC100820574)
Glyma.08G002700.1.p	25.2922	25.4158	25.7926	26.7083	26.1887	26.2083	0.868234	1.72774	0.0187182	aldehyde dehydrogenase family 3 member H1(LOC100800699)
Glyma.15G063400.2.p	26.1627	25.8985	26.0949	26.8761	26.9223	26.9576	0.866635	3.32973	0.000468027	uncharacterized LOC100500019(LOC100500019)
Glyma.07G140400.4.p	28.1504	27.9897	27.7206	28.6866	28.9756	28.7711	0.857495	2.31418	0.00485089	glutathione S-transferase GST 8(LOC547579)
Glyma.07G007000.3.p	29.9779	29.81	29.9401	30.7151	30.8023	30.7703	0.85322	3.93908	0.000115058	lipoxygenase(LOC547835)
Glyma.13G347700.1.p	33.6096	33.6866	33.6292	34.4882	34.5323	34.4112	0.835448	4.41383	3.8563e-05	lipoxygenase(LOXB1)
Glyma.15G026500.3.p	31.2778	31.3745	31.1889	31.9956	32.1267	32.2195	0.833557	3.23332	0.000584361	lipoxygenase L-5(VLXB)
Glyma.08G350800.1.p	25.4194	25.6848	25.6693	26.2216	26.423	26.5996	0.823564	2.39107	0.00406376	beta-amyrin and sophoradiol 24-hydroxylase(CYP93E1)
Glyma.03G119500.1.p	26.7651	26.7133	26.959	27.8579	27.5345	27.512	0.822321	2.44159	0.00361755	magnesium-protoporphyrin IX monomethyl ester [oxidative] cyclase, chloroplastic(LOC100805393)
Glyma.08G242100.4.p	22.944	22.5382	23.2117	23.5146	23.8216	23.7843	0.808868	1.6829	0.0207537	chaperone protein ClpB3, chloroplastic(LOC100785346)
Glyma.03G192300.1.p	23.5372	24.1639	24.6021	24.8632	24.8019	25.0571	0.806286	1.19033	0.0645158	1,4-alpha-glucan-branching enzyme 1, chloroplastic/amyloplastic(LOC100816963)
Glyma.02G088900.1.p	25.8395	25.5573	26.0999	26.711	26.5029	26.6859	0.801022	2.03626	0.00919896	uncharacterized LOC100306409(LOC100306409)
Glyma.07G126400.1.p	27.0522	26.8193	27.0324	27.7887	27.6604	27.7896	0.778282	3.08276	0.000826489	ATP-dependent 6-phosphofructokinase 3(LOC100776597)
Glyma.17G030200.1.p	24.5932	24.6885	24.9742	25.3924	25.4999	25.6882	0.774847	2.24513	0.00568678	uncharacterized LOC547916(LOC547916)
Glyma.08G341800.1.p	25.9799	25.4273	25.6521	26.6046	26.4915	26.2681	0.768309	1.81989	0.0151396	kunitz-type trypsin inhibitor KTI1-like(LOC100799817)
Glyma.02G019600.1.p	27.8242	28.139	27.8716	28.8039	28.6083	28.7124	0.763276	2.59942	0.00251523	uncharacterized LOC100305993(LOC100305993)
Glyma.10G138600.1.p	26.9071	26.971	27.052	27.7767	27.7403	27.6845	0.757137	3.96397	0.00010865	protoporphyrinogen oxidase 1, chloroplastic(LOC100810190)
Glyma.20G129900.1.p	24.9115	25.0583	24.9216	25.7337	25.5892	25.7671	0.732912	3.27385	0.000532289	uncharacterized LOC100306181(LOC100306181)
Glyma.04G249700.1.p	27.0564	26.8577	26.7682	27.4485	27.7224	27.6978	0.728783	2.40283	0.00395523	photosystem II 22 kDa protein, chloroplastic(LOC100807355)
Glyma.06G172600.1.p	28.4745	28.4596	28.6088	29.1981	29.1877	29.3346	0.725819	3.38499	0.000412105	glyceraldehyde-3-phosphate dehydrogenase(GAPC1)
Glyma.19G000700.2.p	25.6405	25.6252	25.6543	26.2748	26.4285	26.3931	0.725449	3.97961	0.000104807	pyruvate kinase(LOC100037452)
Glyma.13G347800.2.p	27.4668	27.6297	27.3925	28.284	28.2903	28.0818	0.722363	2.74397	0.00180314	lipoxygenase(LOX7)
Glyma.13G220000.8.p	24.8927	24.3791	24.9071	25.4098	25.392	25.541	0.721269	1.79589	0.0159997	ABC transporter C family member 2-like(LOC100795004)
Glyma.19G177200.3.p	25.5656	25.5743	25.5495	26.149	26.4272	26.274	0.720256	3.05814	0.000874701	glutathione S-transferase L3(LOC100793025)
Glyma.09G252200.1.p	25.253	25.0256	25.5001	25.6248	25.8761	26.4243	0.715508	1.23143	0.0586907
Glyma.12G032300.1.p	27.7334	28.0751	27.7334	28.7313	28.5079	28.4337	0.710337	2.0961	0.00801499	peroxisomal ascorbate peroxidase(LOC100170727)
Glyma.17G254200.1.p	26.7656	26.9456	26.5709	27.8149	27.3581	27.2237	0.704868	1.55257	0.0280174	thioredoxin H1(LOC100499871)
Glyma.12G007500.1.p	22.6437	22.6165	22.3279	23.4691	23.1852	23.0368	0.701017	1.90614	0.0124126	purple acid phosphatase-like(PHYTASE)
Glyma.05G026300.1.p	28.5602	28.7368	28.6811	29.3427	29.5296	29.1933	0.695829	2.49026	0.00323398	malate dehydrogenase, chloroplastic-like(LOC100783173)
Glyma.19G008500.1.p	25.0395	24.5694	24.2543	25.5312	25.0861	25.3167	0.690298	1.23804	0.0578041	2-methylene-furan-3-one reductase-like(LOC100791274)
Glyma.10G090600.1.p	24.9312	24.7991	24.8376	25.4858	25.5808	25.5559	0.684857	3.83747	0.000145388	primary amine oxidase-like(LOC100804651)
Glyma.14G067000.1.p	24.8105	25.4299	25.6354	25.6146	26.256	26.0398	0.678227	1.02259	0.0949325	ribulose bisphosphate carboxylase/oxygenase activase 1, chloroplastic-like(RCA14)
Glyma.01G008500.1.p	27.0871	27.6516	27.2082	27.7961	27.9786	28.1949	0.674251	1.50825	0.0310279	NADP-dependent malic enzyme-like(LOC100796117)
Glyma.15G080200.1.p	27.0041	27.1101	26.9673	27.654	27.6613	27.7521	0.661979	3.62127	0.000239181	magnesium-chelatase subunit ChlI, chloroplastic(LOC100815274)
Glyma.02G104600.1.p	25.3163	25.2374	25.6625	26.1532	26.1754	25.8676	0.66002	1.80211	0.0157721	UDP-glucosyl transferase 73B2-like(LOC100816053)
Glyma.03G248400.4.p	26.4427	26.6775	26.6882	27.2442	27.5866	26.9247	0.649038	1.45443	0.0351216	putative alto/keto reductase(LOC100301897)
Glyma.15G112500.1.p	26.6259	26.6356	26.496	27.0941	27.2452	27.3442	0.641965	2.77335	0.00168518	plastid-lipid-associated protein, chloroplastic(LOC100806895)
Glyma.13G119100.1.p	25.2959	24.9657	25.3095	25.7619	26.031	25.6667	0.629468	1.79905	0.0158837	5'-nucleotidase domain-containing protein 4-like(LOC100800826)
Glyma.16G165500.1.p	29.0223	28.7353	29.0386	29.1141	29.5451	30.0099	0.624281	1.05998	0.0871006	chlorophyll a-b binding protein, chloroplastic(LOC547819)
Glyma.10G052700.2.p	24.1106	23.9818	23.5499	24.4193	24.6168	24.4668	0.620211	1.58456	0.0260279	uncharacterized LOC100499803(LOC100499803)
Glyma.13G240600.6.p	25.0578	25.5912	25.7307	25.9497	26.0679	26.2123	0.616755	1.32069	0.0477869	allantoinase(LOC100810258)
Glyma.15G061300.1.p	26.2768	26.5114	26.4695	27.3839	26.8013	26.9212	0.616232	1.48839	0.0324796	soluble inorganic pyrophosphatase 1, chloroplastic-like(LOC100787109)
Glyma.11G098700.1.p	28.6098	28.622	28.4442	29.2165	29.1021	29.1958	0.612799	3.09404	0.000805297	peptidyl-prolyl cis-trans isomerase 1-like(LOC100777759)
Glyma.05G066100.1.p	24.8327	24.8825	24.8032	25.3281	25.5319	25.4549	0.59884	3.14518	0.000715844	uncharacterized LOC100789538(LOC100789538)
Glyma.06G074900.1.p	24.4208	24.3518	23.7388	24.7698	24.8363	24.6925	0.595706	1.2666	0.0541253	acetylglutamate kinase, chloroplastic-like(LOC100814183)
Glyma.14G003200.1.p	26.7206	26.9638	26.8778	27.5026	27.4406	27.3388	0.573229	2.58498	0.00260027	oxygen-dependent coproporphyrinogen-III oxidase, chloroplastic-like(LOC100818277)
Glyma.08G165400.1.p	26.3453	26.3035	26.0485	26.7135	26.7066	26.9919	0.571544	1.90779	0.0123655	phosphoglycerate kinase, cytosolic(LOC100796458)
Glyma.08G220900.1.p	24.8419	24.3869	24.7865	25.1908	25.2575	25.2808	0.571266	1.76199	0.0172984	uncharacterized LOC100810662(LOC100810662)
Glyma.20G241500.1.p	26.1957	26.4639	26.2339	26.9272	26.7752	26.893	0.567291	2.39358	0.00404036	chalcone isomerase(CHI)
Glyma.04G247700.1.p	27.2092	27.3359	27.1326	27.7833	27.7852	27.8005	0.563748	3.15936	0.000692858	aminolevulinate, delta-, dehydratase(HEMB)
Glyma.08G082900.1.p	31.1843	30.5629	31.0495	31.4592	31.4034	31.62	0.561956	1.31843	0.0480361	chlorophyll a-b binding protein 3, chloroplastic-like(LOC100805310)
Glyma.08G362900.3.p	27.4163	27.4093	27.6444	28.0324	28.0889	28.0304	0.560575	2.6697	0.00213944	transaldolase(LOC100807267)
Glyma.02G104300.1.p	24.8259	24.4593	24.7017	25.1695	25.4525	25.0419	0.558994	1.58286	0.0261302	abscisate beta-glucosyltransferase-like(LOC100815146)
Glyma.15G144800.4.p	25.604	26.0094	25.7406	26.4299	26.4148	26.1862	0.558963	1.7609	0.0173422	importin subunit alpha-2(LOC100808498)
Glyma.11G221100.5.p	25.7013	25.631	25.954	26.5337	26.2044	26.2216	0.5578	1.73461	0.0184241	probable phosphoribosylformylglycinamidine synthase, chloroplastic/mitochondrial(LOC100818572)
Glyma.19G028400.1.p	28.3237	28.2992	28.4224	29.0171	28.9132	28.7809	0.555315	2.68616	0.00205988	alpha-1,4 glucan phosphorylase L isozyme, chloroplastic/amyloplastic(LOC100806646)
Glyma.05G200500.3.p	26.0999	26.3101	26.3146	26.8648	26.8418	26.6816	0.55453	2.43021	0.00371355
Glyma.10G293500.1.p	28.799	28.7903	28.3359	29.2091	29.1026	29.2731	0.553205	1.58005	0.0262998	transketolase, chloroplastic(LOC100781676)
Glyma.08G063500.1.p	28.6496	28.4938	28.6831	29.1645	29.0861	29.2313	0.551783	2.81064	0.00154654	LL-diaminopimelate aminotransferase, chloroplastic(LOC100807796)
Glyma.03G176400.1.p	26.0202	25.967	26.1403	26.6366	26.4972	26.6319	0.546054	2.86796	0.00135531	ATP phosphoribosyltransferase-like(LOC100817490)
Glyma.04G005900.1.p	25.444	25.3378	25.3551	26.189	25.9899	25.5945	0.545507	1.42781	0.0373414	5'-methylthioadenosine/S-adenosylhomocysteine nucleosidase 2-like(LOC100800253)
Glyma.13G149800.2.p	27.5692	27.3781	27.39	28.03	28.02	27.9156	0.542767	2.78412	0.00164394	pyruvate kinase 1, cytosolic(LOC100802271)
Glyma.06G114400.1.p	27.6258	27.7308	27.7799	28.144	28.3115	28.2948	0.537897	2.81129	0.00154422	probable L-ascorbate peroxidase 6, chloroplastic(LOC100784258)
Glyma.17G261700.1.p	26.9159	26.9043	27.0089	27.2993	27.4782	27.6647	0.537685	2.08286	0.00826297	catalase(CAT1)
Glyma.02G249600.1.p	28.2599	28.5437	28.4772	28.995	29.0053	28.8926	0.537369	2.35211	0.00444519	ribulose bisphosphate carboxylase/oxygenase activase 1, chloroplastic-like(RCAALPHA)
Glyma.04G083100.1.p	26.6176	26.1536	26.3201	26.7252	26.8202	27.1435	0.532523	1.3419	0.0455098	probable lactoylglutathione lyase, chloroplastic(LOC100810908)
Glyma.06G015300.1.p	25.3808	25.2328	25.3578	25.7479	25.8267	25.993	0.532041	2.4662	0.00341824	uncharacterized LOC100527917(LOC100527917)
Glyma.02G270200.1.p	27.7079	27.8153	27.8378	28.3521	28.2797	28.2908	0.520564	3.46074	0.000346143	uncharacterized LOC100306609(LOC100306609)
Glyma.12G190100.1.p	24.1782	24.3409	24.2613	24.4686	25.1202	24.7256	0.51133	1.23032	0.0588411	dnaJ protein homolog(LOC100778677)
Glyma.10G166900.1.p	26.8445	26.9038	26.9157	27.3267	27.4825	27.3536	0.49962	3.1552	0.000699515	rubisco accumulation factor 1, chloroplastic-like(LOC100793519)
Glyma.15G262100.1.p	29.3652	29.4572	29.4777	29.8591	29.9708	29.965	0.498251	3.23973	0.000575799
Glyma.11G053400.1.p	25.0985	25.4172	25.5543	25.8503	26.0721	25.6358	0.496082	1.26073	0.0548617	soyasapogenol B glucuronide galactosyltransferase-like(LOC100777250)
Glyma.13G073200.1.p	26.8491	27.0581	26.8959	27.2867	27.5944	27.3927	0.490252	1.94783	0.0112764	uncharacterized LOC100306132(LOC100306132)
Glyma.01G235600.1.p	26.6606	26.6714	26.3969	27.2133	26.985	26.9926	0.48732	1.85282	0.014034	12-oxophytodienoate reductase 2(LOC100803381)
Glyma.13G168700.4.p	24.5275	24.8619	24.4236	24.9808	25.1506	25.1149	0.477753	1.55031	0.0281637	formate dehydrogenase 1, mitochondrial-like(LOC100794313)
Glyma.08G210500.1.p	24.636	24.3809	24.5434	25.0593	24.9572	24.9743	0.4768	2.3809	0.00416004	3-isopropylmalate dehydratase small subunit 3-like(LOC100782688)
Glyma.15G253800.4.p	23.2574	23.2479	23.6414	23.7984	23.6385	24.1031	0.464454	1.16136	0.0689661	U5 small nuclear ribonucleoprotein 200 kDa helicase-like(LOC100780515)
Glyma.02G268000.1.p	26.9116	26.8772	27.1666	27.357	27.4781	27.5095	0.463043	1.97242	0.0106558	1-aminocyclopropane-1-carboxylate oxidase(LOC100814810)
Glyma.12G014300.1.p	24.9145	24.6073	25.0898	25.4229	25.3831	25.1916	0.46199	1.36526	0.0431261	gamma-tocopherol methyltransferase(LOC732543)
Glyma.06G137100.1.p	27.2509	27.2455	27.1549	27.5565	27.8888	27.5773	0.457101	1.8227	0.0150418	caffeic acid 3-O-methyltransferase-like(LOC100805999)
Glyma.01G102600.1.p	27.244	27.2634	27.052	27.5966	27.6766	27.656	0.456632	2.5083	0.00310244	aldo-keto reductase family 4 member C9(LOC100801791)
Glyma.19G125800.2.p	26.5921	26.518	26.5955	26.7956	27.1271	27.1514	0.456214	1.74942	0.0178067	4-alpha-glucanotransferase DPE2(LOC100793021)
Glyma.11G078700.1.p	25.3917	25.2254	25.5639	26.0835	25.7192	25.7463	0.456012	1.39369	0.0403937	3-dehydroquinate synthase, chloroplastic(LOC100806628)
Glyma.07G160500.1.p	26.2281	25.8441	26.4128	26.6391	26.5686	26.6414	0.454679	1.26097	0.0548321	pyrophosphate--fructose 6-phosphate 1-phosphotransferase subunit alpha(LOC100800863)
Glyma.13G135500.1.p	29.6623	29.8007	29.6303	30.1879	30.0987	30.1637	0.45235	2.81659	0.0015255	In2-1 protein(GSTL5)
Glyma.03G246700.2.p	27.5838	27.4481	27.6062	28.2876	27.7553	27.9327	0.445826	1.27444	0.0531569	probable aldo-keto reductase 1(LOC102670317)
Glyma.19G242300.1.p	26.6007	26.5249	26.6918	26.9383	27.0437	27.1618	0.442143	2.26961	0.00537516	cysteine synthase-like(LOC100794958)
Glyma.08G157700.1.p	28.1473	28.1381	28.0492	28.4231	28.6608	28.5734	0.440866	2.35396	0.00442631	citrate synthase, mitochondrial-like(LOC100781418)
Glyma.17G216000.4.p	28.6151	28.5861	28.6048	29.0039	29.026	29.0768	0.433589	4.31628	4.82752e-05	aspartate aminotransferase(LOC547792)
Glyma.10G267000.1.p	26.8097	26.5591	26.5474	26.8677	27.1987	27.1481	0.432802	1.49668	0.0318654	fruit protein pKIWI502-like(LOC100796877)
Glyma.19G190900.1.p	29.8493	29.6142	29.7245	30.1933	30.2391	30.039	0.427828	2.03231	0.00928297	enolase(LOC547752)
Glyma.11G118800.1.p	26.3848	26.6659	26.4861	26.9625	26.9113	26.941	0.425969	2.15623	0.00697859	ras-related protein Rab7(LOC100795309)
Glyma.06G113200.1.p	30.9475	31.1039	31.1611	31.4501	31.5055	31.5316	0.424861	2.4709	0.00338145	photosystem II 22 kDa protein, chloroplastic-like(LOC100779417)
Glyma.08G181000.1.p	27.3404	27.5048	27.209	27.7257	27.9108	27.6852	0.422503	1.73144	0.0185593	UDP-glycosyltransferase 91A1-like(LOC100793463)
Glyma.13G204800.2.p	27.8332	27.8532	27.7953	28.2503	28.2615	28.2221	0.417407	4.45217	3.53046e-05	ATP synthase gamma chain, chloroplastic(LOC100797290)
Glyma.16G218500.1.p	26.502	26.4706	26.7112	26.8169	27.0741	27.0336	0.413574	1.70513	0.0197183	glutamate decarboxylase-like(LOC100783047)
Glyma.05G026200.1.p	27.6587	27.4956	27.7877	28.1259	27.9404	28.1113	0.411849	1.78612	0.0163637	geranylgeranyl diphosphate reductase, chloroplastic(LOC100779933)
Glyma.05G037500.1.p	25.3764	25.1533	25.3596	25.5791	25.6892	25.8549	0.411307	1.72786	0.018713	1-deoxy-D-xylulose 5-phosphate reductoisomerase, chloroplastic-like(DXR1)
Glyma.13G096000.7.p	24.6091	24.404	24.3525	25.0627	24.8935	24.6307	0.407111	1.28868	0.0514421	mitochondrial outer membrane protein porin of 36 kDa-like(LOC100790270)
Glyma.02G184000.1.p	27.3674	27.2632	27.3373	27.6857	27.7461	27.7101	0.391336	3.41049	0.000388607
Glyma.10G197700.1.p	28.3531	28.3641	28.5085	28.9372	28.8005	28.661	0.390994	1.84675	0.0142315	malate dehydrogenase [NADP], chloroplastic(LOC100782567)
Glyma.08G249900.1.p	27.9426	28.0087	28.1876	28.3217	28.417	28.5718	0.390526	1.71182	0.019417	alpha-1,4-glucan-protein synthase [UDP-forming] 1(LOC100783948)
Glyma.14G070500.1.p	25.7921	26.0214	25.9028	26.5032	26.3109	26.0727	0.390158	1.29664	0.0505078	uncharacterized LOC100306506(LOC100306506)
Glyma.12G191400.1.p	27.8463	27.6212	27.5529	28.0407	27.8909	28.2511	0.387449	1.32396	0.0474284	linolenate hydroperoxide lyase, chloroplastic(LOC100784395)
Glyma.07G183600.1.p	24.4981	24.2655	24.1687	24.8241	24.5686	24.6864	0.382268	1.44954	0.0355193	methylmalonate-semialdehyde dehydrogenase [acylating], mitochondrial(LOC100791508)
Glyma.14G056500.1.p	25.6022	25.2808	25.3415	25.8671	25.6865	25.8134	0.380822	1.56182	0.0274269	cytosolic endo-beta-N-acetylglucosaminidase 1-like(LOC100806533)
Glyma.13G253600.1.p	27.7653	27.9016	27.8658	28.2298	28.1729	28.2626	0.377511	2.83412	0.00146514	soluble inorganic pyrophosphatase 6, chloroplastic(LOC100798544)
Glyma.17G015600.1.p	27.6026	27.651	27.9282	28.0212	28.1583	28.1261	0.374578	1.57182	0.0268027	glucose-1-phosphate adenylyltransferase large subunit 3, chloroplastic/amyloplastic(LOC100792088)
Glyma.18G040100.1.p	27.1561	26.8467	26.899	27.3259	27.4957	27.1952	0.37166	1.34435	0.0452533	dehydroascorbate reductase(LOC732557)
Glyma.11G130200.1.p	25.9432	25.8562	25.9076	26.2301	26.3239	26.2627	0.369891	3.23479	0.000582389	linoleate 13S-lipoxygenase 2-1, chloroplastic-like(LOC100786646)
Glyma.05G055500.1.p	26.9012	26.7547	26.9294	27.0746	27.3666	27.2531	0.369693	1.66912	0.021423	elongation factor G-2, chloroplastic-like(LOC102663021)
Glyma.12G021100.1.p	26.9014	26.8701	26.9889	27.3398	27.3201	27.1992	0.366228	2.53372	0.00292602	porphobilinogen deaminase, chloroplastic-like(LOC100812733)
Glyma.04G032600.1.p	25.6447	25.6662	25.8267	26.1701	25.9141	26.1382	0.361611	1.66437	0.0216584	glucose-6-phosphate isomerase, cytosolic-like(LOC100807719)
Glyma.06G030700.1.p	25.939	25.8736	25.8491	26.2987	26.2783	26.1443	0.353203	2.50877	0.00309903	uncharacterized LOC100805278(LOC100805278)
Glyma.15G089000.1.p	29.5599	29.376	29.5046	29.7772	29.7361	29.9581	0.343652	1.76987	0.0169877	uncharacterized LOC100791176(LOC100791176)
Glyma.16G043500.3.p	27.3244	27.2122	27.2063	27.4953	27.7512	27.5165	0.340053	1.70218	0.0198527
Glyma.02G304500.1.p	28.0536	27.9005	28.0439	28.3566	28.3006	28.3547	0.337966	2.5149	0.00305565	glucose-1-phosphate adenylyltransferase small subunit 2, chloroplastic(LOC100790187)
Glyma.13G282000.1.p	31.2892	31.2691	31.4125	31.6672	31.6168	31.6704	0.327858	2.6174	0.00241326	chlorophyll a-b binding protein 13, chloroplastic-like(LOC100790960)
Glyma.10G030600.1.p	27.3951	27.4177	27.264	27.664	27.6425	27.7293	0.319654	2.37306	0.00423582	2-methyl-6-phytyl-1,4-hydroquinone methyltransferase, chloroplastic-like(LOC100806615)
Glyma.06G017900.1.p	30.5248	30.5071	30.5581	30.9086	30.802	30.8299	0.31682	3.07227	0.000846702	catalase(CAT5)
Glyma.14G023600.1.p	26.7073	26.6615	26.5069	27.0223	26.799	26.9918	0.312468	1.55477	0.0278763	uncharacterized LOC100500302(LOC100500302)
Glyma.06G301500.1.p	28.8297	29.0435	28.8147	29.1957	29.1775	29.2241	0.303106	1.80462	0.0156814	beta-amylase(BMY1)
Glyma.12G046000.1.p	25.4926	25.4892	25.3638	25.7529	25.773	25.7285	0.302952	2.62147	0.0023907	4-hydroxy-3-methylbut-2-enyl diphosphate reductase, chloroplastic(LOC100818067)
Glyma.16G072400.1.p	26.1143	26.2005	26.0435	26.5246	26.3666	26.3709	0.30128	1.92074	0.0120023	uncharacterized LOC100305517(LOC100305517)
Glyma.13G254900.3.p	26.8023	26.7108	26.8729	27.0625	27.097	27.1223	0.298573	2.40284	0.00395514	heat shock 70 kDa protein, mitochondrial(LOC100804559)
Glyma.02G124500.1.p	28.2305	28.104	28.3449	28.4864	28.5311	28.5556	0.297853	1.83189	0.0147269	heat shock protein 90-5, chloroplastic(LOC100819778)
Glyma.14G196800.6.p	25.3594	25.1736	25.3639	25.592	25.5753	25.6227	0.297705	2.01075	0.00975547	ubiquitin-activating enzyme E1 1(LOC100799433)
Glyma.03G185800.1.p	29.0987	28.9599	28.9702	29.2775	29.2985	29.3372	0.294787	2.44985	0.00354936	triosephosphate isomerase, chloroplastic-like(LOC100799358)
Glyma.08G254500.1.p	28.1086	28.1313	28.1759	28.4552	28.456	28.3758	0.290353	3.02932	0.00093472	6-phosphogluconate dehydrogenase, decarboxylating 3(LOC100796103)
Glyma.18G049400.1.p	26.5943	26.5899	26.5908	26.8529	26.908	26.8576	0.281168	4.0371	9.18118e-05	uncharacterized LOC100807863(LOC100807863)
Glyma.02G120900.1.p	28.1066	28.0635	27.956	28.3173	28.3136	28.3279	0.277562	2.45567	0.00350208	alpha-1,4-glucan-protein synthase [UDP-forming]-like(LOC100809983)
Glyma.02G005500.1.p	30.321	30.2826	30.1615	30.4937	30.5046	30.5897	0.274328	2.07136	0.00848476	cytosolic malate dehydrogenase(LOC547963)
Glyma.06G002900.1.p	29.2351	29.1907	29.2167	29.5403	29.3857	29.5085	0.263947	2.24466	0.00569295	glutamate 1-semialdehyde aminotransferase(GSA1)
Glyma.18G215700.1.p	26.3398	26.3904	26.4219	26.7312	26.5983	26.6112	0.262892	2.24759	0.00565466	alpha-galactosidase 1(LOC100812330)
Glyma.18G021500.1.p	27.0876	27.0498	26.9666	27.3167	27.3202	27.2464	0.259724	2.41916	0.00380924	uroporphyrinogen decarboxylase, chloroplastic-like(LOC100800753)
Glyma.14G222500.1.p	26.7925	26.7939	26.751	26.9569	27.0067	27.1397	0.255284	1.97623	0.0105625	thioredoxin-like protein CDSP32, chloroplastic(LOC100814030)
Glyma.01G026700.1.p	30.2347	30.2045	30.2933	30.4263	30.4841	30.5408	0.2396	2.32746	0.00470477	alanine aminotransferase 2(ALAAT2)
Glyma.19G000200.1.p	26.7294	26.7137	26.7789	26.9829	26.9659	26.9543	0.227023	3.35371	0.000442884	uncharacterized LOC100305930(LOC100305930)
Glyma.19G077800.1.p	29.4702	29.4483	29.5344	29.2874	29.2632	29.2631	-0.213044	2.85173	0.00140691	leucine aminopeptidase 1(LOC100808230)
Glyma.06G172000.2.p	26.7894	26.7234	26.7796	26.4617	26.4525	26.531	-0.282365	3.03048	0.00093222	probable aspartyl aminopeptidase(LOC100781379)
Glyma.10G143500.5.p	27.6913	27.5916	27.4822	27.205	27.3052	27.3397	-0.305052	1.86271	0.0137179	aspartic proteinase-like(LOC100776327)
Glyma.19G007800.1.p	26.6492	26.768	26.8985	26.5217	26.4409	26.4345	-0.306228	1.7792	0.0166266	protease Do-like 1, chloroplastic-like(LOC100783304)
Glyma.01G115900.1.p	32.5072	32.4463	32.538	32.1707	32.1894	32.199	-0.310785	3.41447	0.00038506	chlorophyll a-b binding protein CP29.2, chloroplastic-like(LOC100785180)
Glyma.09G065600.1.p	28.8278	28.7309	28.765	28.5755	28.47	28.3296	-0.316206	1.83646	0.0145727	eukaryotic initiation factor 4A-15(LOC100788218)
Glyma.11G102100.2.p	26.9449	26.8566	27.0588	26.5476	26.5828	26.773	-0.318979	1.60203	0.0250016
Glyma.06G131300.1.p	27.214	27.0919	27.0551	26.8664	26.6648	26.8469	-0.327648	1.82337	0.0150184	thylakoid lumenal 17.4 kDa protein, chloroplastic-like(LOC100785667)
Glyma.10G199300.2.p	25.9728	25.6759	25.7056	25.5308	25.3873	25.4422	-0.331352	1.48652	0.0326194	coatomer subunit alpha-2(LOC100784701)
Glyma.15G273600.3.p	30.2634	30.3452	30.2272	29.9584	29.9916	29.8877	-0.33273	2.69693	0.0020094	ADP,ATP carrier protein 1, mitochondrial-like(LOC100789942)
Glyma.04G242000.1.p	27.4562	27.3905	27.4828	27.1353	27.081	27.11	-0.334419	3.34642	0.000450385	uncharacterized LOC100500292(LOC100500292)
Glyma.03G164400.6.p	26.4999	26.7176	26.5091	26.0971	26.366	26.2576	-0.335313	1.47246	0.0336929	dolichyl-diphosphooligosaccharide--protein glycosyltransferase subunit 2(LOC100780415)
Glyma.18G091500.1.p	26.1914	26.1294	26.1347	25.8875	25.8267	25.7285	-0.337608	2.58772	0.00258395	bifunctional dihydroflavonol 4-reductase/flavanone 4-reductase-like(LOC100781477)
Glyma.17G147700.2.p	26.5668	26.5444	26.6626	26.309	26.2415	26.1773	-0.348661	2.57265	0.00267514	ATP-dependent Clp protease proteolytic subunit-related protein 4, chloroplastic(LOC100780029)
Glyma.15G087200.1.p	26.7023	26.7818	26.9004	26.3475	26.5444	26.4297	-0.354257	1.92206	0.0119657	pyridoxine biosynthesis protein(LOC732627)
Glyma.12G234300.2.p	27.4455	27.4172	27.3452	26.9736	27.1741	26.959	-0.367074	2.08189	0.00828153	trifunctional UDP-glucose 4,6-dehydratase/UDP-4-keto-6-deoxy-D-glucose 3,5-epimerase/UDP-4-keto-L-rhamnose-reductase RHM1(LOC100775641)
Glyma.09G154700.2.p	29.7753	29.7998	29.5445	29.282	29.302	29.4312	-0.368168	1.76524	0.0171696	chlorophyll a-b binding protein CP26, chloroplastic(LOC100806585)
Glyma.08G274400.1.p	31.5357	31.4091	31.3007	31.0727	31.0535	31.0041	-0.371752	2.19848	0.00633174	serine hydroxymethyltransferase 3(LOC100499634)
Glyma.05G103600.1.p	29.5315	29.6097	29.7439	29.2351	29.2356	29.2965	-0.372662	2.33146	0.00466163	peroxidase 73-like(LOC100817540)
Glyma.11G210989.1.p	26.3375	26.3701	26.4426	25.9602	26.0305	26.0392	-0.373435	3.1403	0.000723941
Glyma.02G071900.1.p	26.7595	26.4512	26.7958	26.4037	26.1909	26.2669	-0.381681	1.4131	0.0386274	T-complex protein 1 subunit theta(LOC100793494)
Glyma.06G254200.1.p	27.012	26.8748	27.1781	26.5749	26.6898	26.6433	-0.385602	1.83184	0.0147287	proteasome IOTA subunit(PAA1)
Glyma.02G036300.1.p	25.9507	25.9404	25.9285	25.5518	25.4682	25.6404	-0.386391	2.81733	0.0015229	ATP-citrate synthase alpha chain protein 1-like(LOC100818180)
Glyma.05G199200.1.p	24.4891	24.6005	24.7498	24.2474	24.3335	24.0914	-0.38902	1.70282	0.0198234
Glyma.15G250800.1.p	32.1215	32.1681	32.2232	31.6081	31.8278	31.9055	-0.390494	1.85068	0.0141034	peroxisomal glycolate oxidase(LOC100170730)
Glyma.04G215900.2.p	26.6273	27.0056	26.6312	26.4344	26.2665	26.3793	-0.394643	1.36704	0.04295	actin-7(LOC100789000)
Glyma.11G164700.1.p	29.4318	29.4361	29.6167	29.1373	29.0939	29.064	-0.396479	2.44869	0.00355889	cinnamoyl-CoA reductase 1(LOC100806281)
Glyma.11G226900.1.p	31.5695	31.878	31.7867	31.3735	31.2453	31.4233	-0.397369	1.70277	0.0198258	sedoheptulose-1,7-bisphosphatase, chloroplastic(LOC100788090)
Glyma.06G021600.1.p	26.0793	26.0991	26.0904	25.6186	25.6473	25.8079	-0.398338	2.5959	0.00253571	probable 26S proteasome non-ATPase regulatory subunit 3(LOC100814379)
Glyma.20G114000.1.p	26.2447	25.9894	26.2217	25.7593	25.772	25.7259	-0.399558	2.07311	0.0084506	serine/threonine-protein phosphatase 2A 65 kDa regulatory subunit A beta isoform(LOC100811658)
Glyma.19G147900.2.p	29.4571	29.4266	29.6382	29.2086	29.0029	29.0942	-0.405389	1.98613	0.0103246	actin-3-like(LOC100807341)
Glyma.04G191700.1.p	28.9702	28.8961	28.979	28.4497	28.5524	28.6163	-0.408996	2.75198	0.00177019	haloacid dehalogenase-like hydrolase domain-containing protein At3g48420(LOC100816266)
Glyma.09G015600.1.p	27.1324	27.0218	26.824	26.6585	26.6258	26.4622	-0.410543	1.70962	0.0195153	farnesyl pyrophosphate synthase 1(LOC100802347)
Glyma.15G125300.1.p	28.5165	28.5005	28.4856	28.1336	27.9575	28.1679	-0.414513	2.4896	0.00323891	actin depolymerizing factor 1(ADF1)
Glyma.16G026200.1.p	28.0256	28.1508	28.1337	27.6002	27.6366	27.8261	-0.415716	2.18041	0.00660063	rhodanese-like domain-containing protein 4, chloroplastic(LOC100784482)
Glyma.18G248300.1.p	26.1458	26.0745	26.2781	25.8903	25.6919	25.6551	-0.420361	1.95127	0.0111873	2-dehydro-3-deoxyphosphooctonate aldolase-like(LOC100809120)
Glyma.17G171100.1.p	27.4882	27.5396	27.5557	27.209	27.0109	27.0838	-0.426564	2.64909	0.00224342	uncharacterized LOC100305498(LOC100305498)
Glyma.08G126800.1.p	29.6436	29.9053	29.9647	29.3953	29.3222	29.5147	-0.427113	1.70549	0.0197019	uncharacterized LOC100305932(LOC100305932)
Glyma.08G017800.2.p	26.9136	27.0289	27.096	26.4924	26.7762	26.4716	-0.432753	1.74601	0.0179471	monodehydroascorbate reductase, chloroplastic-like(LOC100819919)
Glyma.06G194900.3.p	30.5819	30.671	30.4953	29.8959	30.2344	30.3168	-0.433706	1.45514	0.0350638	chlorophyll a-b binding protein P4, chloroplastic(LOC100798548)
Glyma.17G032100.1.p	25.8432	25.6675	25.5566	25.2835	25.1627	25.2947	-0.442115	2.03964	0.00912757	uncharacterized LOC100500031(LOC100500031)
Glyma.10G012300.1.p	26.5701	26.3416	26.3526	25.9205	25.9715	26.0431	-0.443047	2.23693	0.00579525	ATP-dependent Clp protease proteolytic subunit 5, chloroplastic(LOC100802533)
Glyma.14G064600.3.p	32.279	32.3584	32.2782	31.8485	31.8634	31.8693	-0.444812	4.08017	8.31442e-05	cucumisin(LOC100793805)
Glyma.13G225000.1.p	24.6208	24.7129	24.9003	24.1712	24.5344	24.1853	-0.447708	1.44064	0.0362544	pyridoxal 5'-phosphate synthase subunit PDX1(LOC100816306)
Glyma.17G140600.1.p	26.4577	26.3137	26.4509	26.078	25.9536	25.8428	-0.44928	2.25642	0.00554086	L-lactate dehydrogenase A-like(LOC100803035)
Glyma.19G114500.4.p	32.1338	32.0555	32.0285	31.5676	31.538	31.7597	-0.450869	2.38598	0.00411168	5-methyltetrahydropteroyltriglutamate--homocysteine methyltransferase 1(LOC100802039)
Glyma.02G133900.4.p	24.4661	24.7902	24.9541	24.2914	24.1825	24.3515	-0.46164	1.41721	0.0382643
Glyma.07G089300.1.p	25.4803	25.6157	25.5875	24.8207	25.0712	25.3857	-0.468627	1.30251	0.0498299	probable strigolactone esterase D14 homolog(LOC100794138)
Glyma.14G084500.1.p	26.2893	26.1664	26.1739	25.877	25.7922	25.5469	-0.47118	1.93816	0.0115302	polyadenylate-binding protein 2(LOC100784442)
Glyma.08G063800.1.p	28.4073	28.3298	28.3771	27.5519	27.924	28.2142	-0.47471	1.15662	0.0697236	peroxisomal malate dehydrogenase(LOC100170735)
Glyma.05G043200.1.p	27.4075	26.9234	27.0389	26.7252	26.7915	26.4288	-0.474756	1.21455	0.0610174	28 kDa ribonucleoprotein, chloroplastic(LOC100811487)
Glyma.07G040100.5.p	28.4841	28.4596	28.5682	27.821	28.2162	28.0448	-0.476632	1.79395	0.0160713	subtilisin-like protease SBT1.7(LOC100796787)
Glyma.02G296400.1.p	29.2398	29.1086	29.2945	28.7238	28.6859	28.8018	-0.477143	2.74004	0.00181955	glycerophosphodiester phosphodiesterase GDPDL1(LOC100811399)
Glyma.19G228100.1.p	25.655	25.5753	25.8282	25.012	25.3996	25.2154	-0.477158	1.62209	0.0238734	NHL repeat-containing protein 2(LOC100795843)
Glyma.02G241100.1.p	26.3147	26.1921	26.2185	25.5982	25.8094	25.8803	-0.479114	2.17871	0.0066266
Glyma.04G019100.1.p	29.3443	29.4566	29.3093	29.0107	28.7862	28.8735	-0.479908	2.43045	0.00371154	ATP-dependent zinc metalloprotease FTSH, chloroplastic(LOC100803824)
Glyma.11G224600.1.p	29.7678	29.7873	29.8	29.378	29.3107	29.2249	-0.480509	3.35089	0.000445771	subtilisin-like protease C1(LOC547512)
Glyma.12G228900.7.p	26.0902	25.8679	26.2787	25.6674	25.4953	25.6293	-0.481613	1.6864	0.0205871	uncharacterized LOC100306707(LOC100306707)
Glyma.03G060300.1.p	27.1796	27.4278	27.3074	26.8067	26.8963	26.7667	-0.481674	2.39147	0.00406006	chlorophyll a-b binding protein CP29.2, chloroplastic-like(LOC100785415)
Glyma.13G127200.3.p	26.6861	26.6299	26.95	26.1292	26.4241	26.2658	-0.482291	1.68076	0.0208566	uncharacterized LOC100306491(LOC100306491)
Glyma.06G070700.1.p	28.1265	28.0587	28.3773	27.5906	27.6846	27.8351	-0.484062	1.80175	0.015785	GTP-binding nuclear protein Ran-3(LOC100801379)
Glyma.10G063800.1.p	25.938	26.2258	26.4445	25.6367	25.9139	25.6037	-0.484639	1.28677	0.0516685	uncharacterized LOC100305843(LOC100305843)
Glyma.05G110200.1.p	29.1949	29.4789	29.6571	28.9563	28.9455	28.9723	-0.485624	1.64377	0.0227109	tubulin alpha-3 chain(LOC100787058)
Glyma.18G298300.1.p	27.3481	27.173	27.0514	26.9104	26.5958	26.604	-0.487443	1.65047	0.0223631	14-3-3 protein SGF14a(GF14A)
Glyma.18G290800.1.p	28.0478	28.1358	28.3091	27.6962	27.5939	27.7338	-0.489595	2.30222	0.00498633	actin-11-like(LOC100792119)
Glyma.03G230000.1.p	30.3264	30.4515	30.3771	29.8331	29.9194	29.9295	-0.491	3.30617	0.000494118	uncharacterized LOC100791076(LOC100791076)
Glyma.04G122700.1.p	27.4507	27.136	27.2143	26.8992	26.7367	26.6811	-0.494676	1.89838	0.0126362	60S ribosomal protein L13-1(LOC100805957)
Glyma.06G012600.1.p	25.3786	25.6142	25.5633	25.2548	24.8326	24.9825	-0.495399	1.59155	0.0256123	glycine-rich RNA-binding protein 2(LOC100777821)
Glyma.03G167000.4.p	24.7078	24.6757	24.3667	24.209	24.0341	24.0095	-0.499194	1.78316	0.0164755	pre-mRNA-processing factor 39-like(LOC100787373)
Glyma.05G181700.2.p	23.8018	24.0038	24.0395	23.0467	23.607	23.6717	-0.506575	1.12484	0.0750167
Glyma.16G095100.1.p	24.4102	24.3839	24.6374	23.7109	24.2796	23.9183	-0.507522	1.28887	0.0514194	plastidal glycolate/glycerate translocator 1, chloroplastic-like(LOC100775540)
Glyma.05G243800.2.p	28.4494	28.5653	28.3718	28.1191	27.7949	27.9458	-0.508896	2.01765	0.00960174
Glyma.19G232700.4.p	27.4883	27.1516	27.3471	26.7728	26.9865	26.694	-0.51123	1.75673	0.0175092	uncharacterized LOC100499714(LOC100499714)
Glyma.13G144800.1.p	28.3497	28.5995	28.4444	27.7521	28.2519	27.8428	-0.515603	1.41178	0.0387452	adenosine kinase 2-like(LOC100801737)
Glyma.15G050200.1.p	27.529	27.5144	27.8459	26.8376	27.1777	27.3257	-0.516116	1.33783	0.0459374	actin-101(LOC100778206)
Glyma.07G215900.1.p	29.5982	29.676	29.6834	29.1076	29.1322	29.1569	-0.520276	4.14477	7.16523e-05	uncharacterized protein At4g06744-like(LOC100781948)
Glyma.05G186600.1.p	26.1002	26.0062	26.4725	25.5317	25.5168	25.9631	-0.522385	1.20254	0.0627276
Glyma.11G122700.1.p	27.4331	27.4315	27.7307	26.9308	26.9547	27.1386	-0.52372	1.93041	0.011738	9-divinyl ether synthase-like(LOC100810890)
Glyma.13G316400.2.p	24.9552	25.2113	25.2428	24.4532	24.4857	24.8978	-0.524232	1.4372	0.0365425	60S ribosomal protein L10a(LOC100527698)
Glyma.08G364000.1.p	26.057	25.8654	26.0151	25.6515	25.4884	25.2208	-0.525586	1.71851	0.0191203	T-complex protein 1 subunit zeta 1(LOC100809943)
Glyma.18G241700.1.p	28.5626	29.2037	28.5586	28.3272	28.1251	28.292	-0.526854	1.1097	0.077678	uncharacterized LOC100500317(LOC100500317)
Glyma.08G123100.1.p	25.8569	25.842	25.6869	25.5707	24.9147	25.3078	-0.53084	1.25709	0.0553233	T-complex protein 1 subunit alpha-like(LOC100818130)
Glyma.08G150400.3.p	30.5804	30.4081	30.4793	30.0066	29.8607	30.0045	-0.531991	2.80537	0.0015654
Glyma.15G257100.3.p	30.8567	30.7742	30.7835	30.3048	30.297	30.2077	-0.534946	3.71616	0.000192237	elongation factor 2(LOC100788357)
Glyma.03G120000.6.p	26.4065	26.4412	26.6337	26.0091	26.1696	25.6943	-0.536154	1.57489	0.0266143	alpha-L-arabinofuranosidase 1(LOC100806458)
Glyma.16G008900.2.p	27.0564	26.5353	26.3547	26.2269	26.0615	26.0206	-0.545754	1.16845	0.0678498	subtilisin-like protease SBT1.7(LOC100793990)
Glyma.20G077200.1.p	26.0166	26.2245	26.1516	25.4599	25.838	25.448	-0.548958	1.74537	0.0179732	probable voltage-gated potassium channel subunit beta(LOC100807722)
Glyma.18G074100.1.p	26.1725	26.3109	26.093	25.4413	25.7765	25.711	-0.549168	1.98188	0.0104261	heat shock protein 90-1(HSP90-1)
Glyma.03G262800.2.p	25.6735	25.5839	25.8472	24.9162	25.3679	25.1663	-0.551367	1.65523	0.0221193	26S protease regulatory subunit 7-like(LOC100796358)
Glyma.10G043000.1.p	27.0838	27.1153	26.9791	26.5716	26.6125	26.3352	-0.552967	2.3509	0.00445754	26S proteasome regulatory subunit 4 homolog A(LOC100783293)
Glyma.19G183400.1.p	29.0628	29.0683	29.2452	28.5727	28.616	28.5194	-0.556035	2.96071	0.00109469	cell division cycle protein 48 homolog(LOC100814141)
Glyma.13G130900.1.p	26.6306	26.4007	26.8791	26.2038	26.056	25.9614	-0.563089	1.65459	0.0221519
Glyma.03G171100.1.p	30.9053	31.0084	30.9136	30.4606	30.2941	30.3805	-0.564036	3.193	0.000641209	heat shock cognate 70 kDa protein 2(LOC100798307)
Glyma.18G265100.1.p	28.028	28.1755	28.2691	27.4626	27.6942	27.6151	-0.566935	2.35774	0.0043879	UDP-glucose 6-dehydrogenase 1(LOC100803962)
Glyma.11G248000.2.p	26.765	26.5232	26.4504	26.1408	25.8671	25.9932	-0.579128	2.02534	0.00943326	3-oxoacyl-[acyl-carrier-protein] reductase 4(LOC100806814)
Glyma.18G116900.1.p	30.9083	31.1452	30.8886	30.4028	30.2014	30.6004	-0.579168	1.82438	0.0149837	serine--glyoxylate aminotransferase-like(SGT2)
Glyma.12G172800.1.p	26.0668	26.2089	26.2569	25.2905	25.6918	25.8116	-0.57952	1.58718	0.0258713	protein disulfide isomerase-like protein(PDIL-2)
Glyma.08G332900.1.p	30.0439	30.0825	30.1017	29.5209	29.588	29.369	-0.583403	3.01969	0.000955679	heat shock cognate protein 80-like(HSP90-2)
Glyma.11G121100.6.p	24.1081	24.5423	24.1043	23.5167	23.849	23.6268	-0.587405	1.54556	0.0284734	protein TIC 62, chloroplastic-like(LOC100802919)
Glyma.17G230300.1.p	24.923	25.0978	25.0939	24.6847	24.5188	24.1317	-0.593157	1.57031	0.0268964	far upstream element-binding protein 1-like(LOC100782717)
Glyma.20G089400.1.p	25.4872	25.7858	25.8576	25.1333	25.3369	24.8698	-0.596903	1.55709	0.0277277	eukaryotic translation initiation factor 3 subunit M-like(LOC100788645)
Glyma.03G124400.1.p	29.8398	29.8636	29.9234	29.4985	29.1804	29.1479	-0.599991	2.19678	0.00635654	beta-tubulin(TUBB3)
Glyma.09G023400.3.p	24.0534	23.8069	23.9801	23.0767	23.7171	23.2436	-0.600957	1.36753	0.0429013	beta-glucosidase BoGH3B-like(LOC100775219)
Glyma.14G018700.1.p	26.6779	26.6262	26.7274	26.1355	26.0463	26.0467	-0.600999	3.87334	0.000133864	trigger factor-like protein TIG, Chloroplastic(LOC100812597)
Glyma.10G058000.1.p	26.8706	26.8533	26.7468	26.3474	26.228	26.0883	-0.602281	2.69276	0.00202882	adenosine kinase 2-like(LOC100780391)
Glyma.11G200000.1.p	24.792	24.8899	24.6782	23.7977	24.3637	24.3878	-0.603598	1.39165	0.0405832	26S protease regulatory subunit 6B homolog(LOC100820353)
Glyma.20G236500.1.p	25.9086	25.692	25.8334	25.2849	25.5511	24.7762	-0.60733	1.20921	0.0617711	26S protease regulatory subunit 6A homolog(LOC100788486)
Glyma.18G007500.1.p	25.3065	24.6855	24.5889	24.2098	24.1784	24.3703	-0.607498	1.22702	0.0592894	uncharacterized LOC100305777(LOC100305777)
Glyma.16G096600.3.p	23.3746	23.6387	23.3723	22.7916	22.8555	22.9134	-0.608336	2.51251	0.0030725	phototropin-2-like(LOC100804783)
Glyma.15G052500.1.p	25.3626	25.4957	25.2134	24.5653	24.9123	24.7615	-0.610827	2.03799	0.00916243	3-hydroxyacyl-[acyl-carrier-protein] dehydratase FabZ(LOC100817945)
Glyma.17G073200.1.p	25.1617	25.2567	25.1917	24.8818	24.32	24.5743	-0.611364	1.68471	0.0206674	serine carboxypeptidase 24-like(LOC100783242)
Glyma.01G227400.1.p	25.4618	25.6282	25.2096	24.6908	24.8479	24.9031	-0.619274	1.96926	0.0107336	porphobilinogen deaminase, chloroplastic-like(LOC100779132)
Glyma.14G094700.3.p	28.8485	28.9759	29.1947	28.3999	28.4605	28.2842	-0.624774	2.27396	0.00532158	glycine dehydrogenase (decarboxylating), mitochondrial(LOC100819714)
Glyma.08G108800.1.p	30.3671	30.5575	30.3638	29.7518	29.9198	29.7397	-0.625675	2.71338	0.00193475	adenosylhomocysteinase(LOC100786939)
Glyma.17G126700.2.p	24.4288	24.3229	24.5219	23.9128	24.0947	23.3798	-0.628794	1.32535	0.047277
Glyma.16G038300.9.p	28.6476	28.4795	28.4007	27.9252	27.6005	28.1123	-0.629901	1.71437	0.0193034	methionine synthase(LOC547643)
Glyma.11G181400.1.p	23.4696	22.9856	23.0054	22.5703	22.1916	22.7864	-0.637461	1.2726	0.0533826	nicalin-1(LOC100779713)
Glyma.01G199700.1.p	28.5662	28.6805	28.9099	28.471	28.0634	27.7067	-0.638494	1.23487	0.0582275	uncharacterized LOC100306654(LOC100306654)
Glyma.05G168400.1.p	29.3509	29.7951	29.6851	28.9302	28.9544	29.0104	-0.645355	2.04944	0.008924	FERREDOXIN-1, CHLOROPLASTIC-RELATED
Glyma.08G272600.1.p	27.6531	27.7325	27.8717	27.1403	27.1604	27.0054	-0.650389	2.89799	0.00126475	mitochondrial carnitine/acylcarnitine carrier-like protein-like(LOC100787304)
Glyma.10G067500.1.p	29.893	29.8366	29.7692	29.1315	29.2251	29.1755	-0.655568	3.89453	0.000127487	monodehydroascorbate reductase-like(LOC100787700)
Glyma.06G101500.2.p	29.4538	29.536	29.5596	28.9585	28.8997	28.7234	-0.655919	2.96966	0.00107237	14-3-3-like protein(LOC100792014)
Glyma.13G344500.1.p	26.8851	26.7823	26.9078	26.1525	26.2438	26.2074	-0.657189	3.82476	0.000149707	probable fructokinase-4(LOC100814192)
Glyma.08G115100.1.p	29.8088	29.8001	29.9541	29.2439	29.1458	29.1988	-0.658159	3.48023	0.000330958	tubulin alpha-3 chain-like(LOC100806907)
Glyma.12G117600.1.p	27.3767	27.1822	27.4634	26.4947	26.8008	26.7506	-0.658727	2.19351	0.00640458	26S proteasome non-ATPase regulatory subunit 2 homolog A(LOC100777078)
Glyma.07G020000.1.p	28.141	28.3427	28.1832	27.6284	27.3632	27.6976	-0.659232	2.28493	0.00518883	uncharacterized LOC100305682(LOC100305682)
Glyma.11G020100.1.p	28.242	28.1816	28.3	27.4505	27.7428	27.5517	-0.65954	2.69348	0.00202546	40S ribosomal protein S2-4-like(LOC100820352)
Glyma.11G117300.1.p	28.0791	27.9585	27.992	27.2783	27.5224	27.24	-0.663007	2.64625	0.00225811	glycine-rich RNA-binding protein GRP1A-like(LOC100796543)
Glyma.06G105900.1.p	27.4472	27.5136	27.5746	26.8787	26.8869	26.7773	-0.664176	3.69916	0.000199912	acetyl-CoA carboxylase 1-like(LOC100803679)
Glyma.10G194000.1.p	26.6232	26.6741	26.8701	25.9684	25.9236	26.274	-0.667133	2.12622	0.00747783	anthocyanidin 3-O-glucosyltransferase-like(LOC100819964)
Glyma.01G029200.1.p	28.61	28.6104	28.3324	27.799	27.7521	27.977	-0.674892	2.37328	0.00423371	ubiquitin-40S ribosomal protein S27a-like(LOC100784307)
Glyma.07G087500.4.p	24.2356	24.0392	24.0084	23.0649	23.3042	23.8894	-0.674903	1.24255	0.0572077	aldehyde dehydrogenase family 2 member C4-like(LOC100783920)
Glyma.09G047200.1.p	26.4882	26.3876	26.0348	25.3641	25.4563	26.0461	-0.681328	1.2587	0.0551192	uncharacterized LOC100499895(LOC100499895)
Glyma.06G138700.1.p	25.8058	26.0734	25.7921	25.4448	25.3079	24.8685	-0.683423	1.59542	0.0253854	60S ribosomal protein L9-like(LOC100811498)
Glyma.04G029400.1.p	26.6157	27.1434	26.6845	25.912	26.4631	25.9922	-0.692101	1.35512	0.0441446	26S protease regulatory subunit 10B homolog A(LOC100788475)
Glyma.06G295700.1.p	30.5475	30.7226	30.4861	29.8802	29.8785	29.9166	-0.693605	3.18912	0.000646966	3'-hydroxy-N-methyl-(S)-coclaurine 4'-O-methyltransferase-like(LOC100812768)
Glyma.08G302600.6.p	28.2636	28.3199	28.3336	27.5177	27.6917	27.6208	-0.695679	3.65266	0.000222507	enzymatic resistance protein(SGT3)
Glyma.15G140300.1.p	28.5665	28.467	28.6984	27.7479	27.8656	28.0228	-0.698534	2.59093	0.00256489	ATP-citrate synthase beta chain protein 1(LOC100795745)
Glyma.13G098500.1.p	25.5229	26.0431	25.7956	25.0402	25.1834	25.0335	-0.701483	1.94572	0.0113314	putative glucose-6-phosphate 1-epimerase-like(LOC100787970)
Glyma.12G045400.1.p	25.7577	25.4709	25.5916	24.5097	24.8676	25.3343	-0.702888	1.3028	0.049797	dolichyl-diphosphooligosaccharide--protein glycosyltransferase 48 kDa subunit(LOC100806848)
Glyma.16G127500.1.p	28.1944	28.3274	28.225	27.6546	27.4125	27.57	-0.703235	3.00279	0.000993599	40S ribosomal protein S4-1(LOC100795220)
Glyma.19G028700.1.p	26.9871	27.2347	27.04	26.4549	26.3462	26.346	-0.704906	2.9657	0.00108218	uncharacterized LOC100527647(LOC100527647)
Glyma.19G181300.1.p	26.5895	26.5256	26.3726	25.486	25.9297	25.946	-0.708669	1.90663	0.0123986	aquaporin PIP2-1(LOC100807883)
Glyma.15G176900.1.p	29.5015	29.7031	29.4558	28.5526	28.9188	29.0604	-0.709509	1.86033	0.0137933	auxin-binding protein ABP19a-like(LOC100806553)
Glyma.02G308500.1.p	27.1847	26.8327	27.4045	26.4446	26.4633	26.3802	-0.711255	1.87147	0.013444	acetyl-CoA acetyltransferase, cytosolic 1(LOC100804647)
Glyma.U031121.1.p	27.8246	28.4953	27.7545	27.1486	27.3382	27.4487	-0.712953	1.325	0.0473152
Glyma.06G020400.1.p	27.6974	27.2385	27.5237	26.7247	26.5708	27.024	-0.713337	1.7117	0.0194223	uncharacterized LOC100499708(LOC100499708)
Glyma.17G228800.1.p	31.5743	31.723	31.5585	30.8427	30.9446	30.9245	-0.714636	3.5183	0.000303181	glycine dehydrogenase (decarboxylating), mitochondrial(LOC100777528)
Glyma.10G160300.1.p	26.1426	26.1407	25.8821	25.7183	25.3242	24.9786	-0.714804	1.44133	0.0361969	uncharacterized LOC100499673(LOC100499673)
Glyma.14G176900.2.p	27.6747	27.7979	27.6825	27.008	26.8961	27.0976	-0.71782	3.27811	0.000527093	14-3-3-like protein(LOC100794129)
Glyma.06G162500.9.p	27.097	27.1453	27.3313	26.449	26.652	26.3078	-0.721614	2.37771	0.00419075	staphylococcal nuclease domain-containing protein 1-like(LOC100794481)
Glyma.13G129400.1.p	23.1965	24.0664	23.5683	23.1574	22.7599	22.7483	-0.721858	1.18795	0.0648705	uncharacterized LOC100526993(LOC100526993)
Glyma.17G096100.2.p	28.2213	28.1092	28.4129	27.2898	27.7996	27.4856	-0.722784	1.85634	0.0139205	ATPase 11, plasma membrane-type-like(LOC100802859)
Glyma.08G048800.1.p	25.4136	25.6827	25.4247	25.0513	25.0389	24.2546	-0.725417	1.2266	0.0593476	26S proteasome non-ATPase regulatory subunit 1 homolog A(LOC100817941)
Glyma.05G180600.1.p	30.1573	30.1836	30.14	29.5705	29.4253	29.2747	-0.736809	2.98511	0.00103488
Glyma.09G258000.1.p	25.8631	25.7174	25.5888	24.9771	25.201	24.7804	-0.736958	2.1501	0.00707777	bifunctional L-3-cyanoalanine synthase/cysteine synthase 1, mitochondrial(LOC100806420)
Glyma.09G090100.1.p	27.7594	28.2761	28.4719	27.3977	27.5759	27.3215	-0.73744	1.51176	0.0307783
Glyma.02G004100.1.p	26.6842	27.0399	26.8018	26.05	26.1179	26.1449	-0.737693	2.61381	0.00243324	probable 60S ribosomal protein L14(LOC100817659)
Glyma.07G273600.1.p	24.4085	24.2297	24.6114	23.2803	23.9982	23.7404	-0.743613	1.45598	0.034996	prolycopene isomerase, chloroplastic(LOC100810986)
Glyma.12G066700.2.p	28.1251	27.8971	27.4076	27.1123	27.1711	26.9084	-0.746036	1.52345	0.0299604	uncharacterized LOC100500043(LOC100500043)
Glyma.03G098900.1.p	26.4479	25.9087	26.269	25.1756	25.5487	25.6565	-0.748259	1.59397	0.0254703	2-alkenal reductase (NADP(+)-dependent)-like(LOC100812880)
Glyma.04G112800.1.p	27.7105	27.8544	27.8331	27.0904	27.0924	26.97	-0.748363	3.61267	0.000243967	uncharacterized LOC100305786(LOC100305786)
Glyma.17G125700.1.p	28.189	27.9828	28.166	27.2215	27.3687	27.4875	-0.753396	2.76533	0.00171662	31 kDa ribonucleoprotein, chloroplastic-like(LOC100804984)
Glyma.11G053700.1.p	24.3369	24.4357	24.1249	23.2675	23.5745	23.786	-0.756503	1.89544	0.0127221	CBS domain-containing protein CBSX1, chloroplastic(LOC100527375)
Glyma.07G060000.1.p	26.6839	26.7281	27.4341	26.3732	26.2876	25.909	-0.758771	1.26347	0.0545171	60S ribosomal protein L5-like(LOC100818819)
Glyma.12G207600.1.p	28.4242	28.6279	28.5428	27.7017	27.8188	27.7767	-0.76587	3.44404	0.000359714	fasciclin-like arabinogalactan protein 13(LOC100500293)
Glyma.12G194800.3.p	24.074	23.9651	23.7188	22.9138	23.1401	23.4037	-0.766729	1.91494	0.0121635	syntaxin-132(LOC100800991)
Glyma.06G165200.3.p	30.4749	30.5867	30.3874	29.8017	29.5712	29.7709	-0.768408	2.94139	0.00114448	chaperone protein ClpC, chloroplastic(LOC100804035)
Glyma.08G345900.1.p	26.4109	26.7247	26.805	25.5318	25.6671	26.4239	-0.772603	1.20042	0.0630353	enoyl-[acyl-carrier-protein] reductase [NADH] 2, chloroplastic-like(LOC100810475)
Glyma.05G158100.4.p	23.0949	23.2317	23.9759	22.7148	22.8411	22.4	-0.782178	1.21099	0.0615198	14-3-3 protein SGF14c(GF14C)
Glyma.18G139400.3.p	29.0119	28.9955	28.857	28.1534	28.3021	28.0611	-0.782633	3.09808	0.000797846	uncharacterized LOC100306021(LOC100306021)
Glyma.10G099200.3.p	25.0122	25.2425	25.3215	24.5161	24.1287	24.5811	-0.783427	2.01054	0.00976029	villin-3-like(LOC100807846)
Glyma.01G236600.1.p	26.6433	26.9706	27.1129	26.3708	26.0469	25.9576	-0.783845	1.85829	0.0138582	40S ribosomal protein S3a-like(LOC100805519)
Glyma.03G224500.2.p	26.7733	26.9696	26.9316	26.044	26.2799	25.9977	-0.784286	2.74884	0.00178302	proline--tRNA ligase, cytoplasmic(LOC100816763)
Glyma.03G215300.1.p	28.2513	28.4798	28.1865	27.4532	27.6649	27.4427	-0.785606	2.62374	0.00237824	uncharacterized LOC100499789(LOC100499789)
Glyma.17G134800.1.p	27.0538	26.9724	27.1608	26.2918	25.9818	26.5429	-0.790164	2.00384	0.00991196	40S ribosomal protein S13(LOC100790163)
Glyma.18G090900.1.p	26.6634	26.7353	26.6363	25.5651	26.2705	25.8099	-0.79651	1.72372	0.018892	protein ASPARTIC PROTEASE IN GUARD CELL 2(LOC100791245)
Glyma.08G025300.1.p	24.217	24.1561	24.0728	23.515	22.8487	23.6844	-0.799281	1.43783	0.0364897	kinesin light chain(LOC100815100)
Glyma.14G004200.1.p	27.2801	27.3784	27.405	26.4779	26.5186	26.6319	-0.811715	3.77096	0.00016945	fasciclin-like arabinogalactan protein 2(LOC100799605)
Glyma.04G020300.1.p	29.7123	29.8616	29.4866	28.7923	28.9175	28.9142	-0.812175	2.6522	0.0022274	uncharacterized LOC100306554(LOC100306554)
Glyma.04G188700.1.p	27.0938	27.4782	28.1404	26.7944	26.9621	26.5186	-0.812445	1.15115	0.070607	elongation factor Tu, chloroplastic-like(LOC100805960)
Glyma.08G108900.3.p	29.0757	29.1725	29.1008	28.3942	28.2672	28.2494	-0.812754	3.94362	0.000113862	serine hydroxymethyltransferase 2(SHMT)
Glyma.06G100200.2.p	27.7005	27.7625	27.9469	27.0634	26.8668	27.033	-0.815555	2.97833	0.00105116	RNA-binding protein CP31B, chloroplastic(LOC100790439)
Glyma.08G136200.1.p	24.4542	24.7114	24.1101	23.8077	23.5061	23.5076	-0.818106	1.81772	0.0152154	annexin D2-like(LOC100815639)
Glyma.05G199800.1.p	23.35	24.116	23.9385	23.2409	22.7146	22.9856	-0.821145	1.38375	0.0413287
Glyma.08G015300.1.p	26.0395	25.8577	25.8136	24.7994	25.1346	25.3129	-0.821281	2.1126	0.00771609	probable aquaporin PIP1-2(LOC100780356)
Glyma.09G183300.2.p	27.2467	27.1872	27.2824	26.3284	26.3977	26.508	-0.827399	3.81787	0.000152099	40S ribosomal protein S7(LOC100499757)
Glyma.09G062600.1.p	24.9926	25.0489	25.6491	24.5797	24.4524	24.1749	-0.827834	1.57416	0.0266589	xyloglucan endotransglucosylase/hydrolase 2(LOC100778237)
Glyma.15G136800.1.p	23.9439	24.1017	23.8078	22.8115	23.6179	22.9116	-0.837466	1.45338	0.0352064	30S ribosomal protein S1, chloroplastic-like(LOC100806905)
Glyma.05G132500.1.p	25.9348	25.7199	25.996	24.5706	25.3849	25.1816	-0.837851	1.49923	0.0316791	60S ribosomal protein L35a-1-like(LOC100800463)
Glyma.20G083300.1.p	28.1698	28.0404	28.1132	27.3664	27.1533	27.2575	-0.848733	3.5269	0.000297238	uncharacterized LOC100499737(LOC100499737)
Glyma.15G013800.2.p	24.3378	24.7111	25.2417	24.3043	23.9585	23.4413	-0.862125	1.1174	0.0763135	coatomer subunit beta'-2-like(LOC100804239)
Glyma.11G021700.1.p	27.2801	27.4326	27.2515	26.6816	26.4536	26.2106	-0.872806	2.39244	0.00405094
Glyma.17G020600.1.p	26.1358	26.6153	26.4582	25.0848	25.4791	25.9878	-0.885825	1.3909	0.0406536	pyruvate, phosphate dikinase, chloroplastic-like(LOC100786435)
Glyma.10G184900.1.p	25.5446	25.8452	25.1102	24.4702	24.6937	24.6748	-0.887108	1.77146	0.0169255	uncharacterized LOC100797579(LOC100797579)
Glyma.08G042300.2.p	27.7638	27.873	27.9918	26.9201	26.7503	27.2932	-0.888326	2.16367	0.00686016	uncharacterized LOC100499657(LOC100499657)
Glyma.13G237800.1.p	27.885	27.9323	27.9517	27.0566	26.9925	27.0469	-0.890998	5.22891	5.90325e-06	40S ribosomal protein S6-like(LOC100801194)
Glyma.08G006400.3.p	23.7614	24.1457	24.8046	23.2055	23.4532	23.3683	-0.894887	1.33684	0.0460431	staphylococcal nuclease domain-containing protein 1(LOC100782692)
Glyma.17G247300.4.p	27.283	26.9808	26.931	26.394	25.8401	26.2473	-0.904479	1.9816	0.0104329	uncharacterized LOC100305975(LOC100305975)
Glyma.07G031100.5.p	28.4433	28.3998	28.5114	27.4146	27.8253	27.3915	-0.907744	2.48307	0.00328796	phospholipase D alpha 1(LOC100794849)
Glyma.03G142900.3.p	23.9818	24.2575	24.9802	23.7114	23.2809	23.5001	-0.909039	1.31952	0.0479161	uncharacterized LOC100527715(LOC100527715)
Glyma.18G281200.1.p	24.8845	24.2813	24.8188	24.0111	24.0686	23.1743	-0.910204	1.23393	0.0583537	60S ribosomal protein L30(LOC100806260)
Glyma.10G041900.1.p	24.1718	24.3774	24.518	23.3028	22.9416	24.091	-0.910594	1.2091	0.0617876	uncharacterized LOC100305906(LOC100305906)
Glyma.14G126200.1.p	26.1037	26.1932	26.3984	25.3432	25.5146	25.0974	-0.913395	2.44256	0.00360942	uncharacterized LOC100776765(LOC100776765)
Glyma.04G136000.1.p	29.4884	29.5482	29.4997	28.6545	28.4972	28.6372	-0.91582	4.17927	6.61798e-05	protein ASPARTIC PROTEASE IN GUARD CELL 2-like(LOC100784561)
Glyma.18G057900.1.p	28.7089	28.4975	28.5208	27.5818	27.5804	27.8073	-0.919198	3.09525	0.00080306	dihydroflavonol reductase(LOC100137082)
Glyma.17G138300.6.p	27.5669	27.2851	27.0345	26.4394	26.3568	26.3109	-0.926449	2.37142	0.0042519	monocopper oxidase-like protein SKU5(LOC100798971)
Glyma.05G152000.2.p	26.5729	26.2952	26.0989	25.5512	25.3635	25.2718	-0.926805	2.35315	0.00443456	adenosylhomocysteinase-like(LOC100815953)
Glyma.15G267100.1.p	24.3568	23.3704	24.4597	23.0445	23.0452	23.314	-0.927772	1.21554	0.0608774	40S ribosomal protein SA-like(LOC100818292)
Glyma.08G238100.1.p	25.888	25.5264	26.0087	24.1013	25.6158	24.9203	-0.928595	0.942065	0.114271	cytochrome P450 72A15(CYP72A67)
Glyma.01G081300.1.p	29.4844	29.5185	29.5859	28.5196	28.582	28.6982	-0.929666	3.98822	0.000102749	alpha-xylosidase 1-like(LOC100808526)
Glyma.19G238800.1.p	28.147	28.4155	28.5065	27.2635	27.362	27.6474	-0.932056	2.38601	0.0041114	40S ribosomal protein S14(LOC100785807)
Glyma.06G020700.1.p	23.8736	24.3693	24.1117	23.1477	23.3564	23.0529	-0.932537	2.2798	0.00525049	24-methylenesterol C-methyltransferase 2(LOC100791154)
Glyma.09G239800.1.p	25.1169	25.1585	25.1221	24.6982	23.4857	24.3961	-0.939205	1.21032	0.0616138	aldose 1-epimerase-like(LOC100798975)
Glyma.13G136400.1.p	25.3734	25.6346	25.7611	24.3413	25.0605	24.5467	-0.940162	1.74779	0.0178736	60S ribosomal protein L4(LOC100779764)
Glyma.09G131900.1.p	26.2366	25.9484	26.425	25.1111	25.0968	25.5604	-0.94725	1.99919	0.0100186	glutaminyl-peptide cyclotransferase-like(LOC100812294)
Glyma.14G050900.1.p	24.4387	24.6	24.2575	23.1776	23.7516	23.524	-0.947676	2.08994	0.00812949	GDSL esterase/lipase At2g04570-like(LOC100804416)
Glyma.20G017700.1.p	25.4564	25.3692	25.9308	24.826	25.0706	24.0001	-0.953203	1.21746	0.0606098	uncharacterized LOC100527036(LOC100527036)
Glyma.09G008100.1.p	25.7443	25.3715	25.4134	24.621	24.5274	24.5176	-0.954436	2.83574	0.00145969	plastid-lipid-associated protein, chloroplastic(LOC100800029)
Glyma.12G084100.3.p	27.3108	27.427	27.4185	26.4647	26.1981	26.6252	-0.956113	2.73923	0.00182292	UDP-D-apiose/UDP-D-xylose synthase 2(LOC102667779)
Glyma.10G048600.1.p	28.8215	28.9932	28.7715	28.059	27.7762	27.8774	-0.957843	3.07171	0.00084779	60S ribosomal protein L4(LOC100786828)
Glyma.02G220000.1.p	27.2453	27.576	27.8865	26.294	27.0535	26.4627	-0.965843	1.51119	0.0308185	60S ribosomal protein L10(LOC100777196)
Glyma.02G167900.1.p	28.0457	28.1042	27.9553	27.0241	26.7903	27.3899	-0.966967	2.23847	0.00577476	40S ribosomal protein S5(LOC100803239)
Glyma.17G133600.1.p	24.4521	24.4601	24.5854	23.8864	22.7428	23.9653	-0.967634	1.14522	0.0715788	FAM10 family protein At4g22670(LOC100785914)
Glyma.04G091800.1.p	28.3365	28.2868	28.463	27.2045	27.5611	27.4166	-0.968031	2.94677	0.00113039	protein ASPARTIC PROTEASE IN GUARD CELL 2(LOC100788630)
Glyma.20G240700.1.p	26.7316	26.7159	26.7321	25.826	25.5199	25.8831	-0.983522	3.01935	0.000956424	60S ribosomal protein L35(LOC100801539)
Glyma.14G061500.1.p	28.6704	28.5391	28.6129	27.6012	27.8069	27.4521	-0.987405	3.07447	0.000842421	probable aquaporin PIP-type 7a(LOC100780145)
Glyma.17G127100.1.p	26.4594	26.4969	26.3848	25.2793	25.4937	25.6058	-0.98744	3.2073	0.000620442	probable 26S proteasome non-ATPase regulatory subunit 6-like(LOC100810692)
Glyma.08G217700.5.p	25.5307	25.681	25.8445	24.7294	24.5737	24.7811	-0.990633	3.0751	0.000841204	uncharacterized LOC100305687(LOC100305687)
Glyma.13G364900.3.p	25.0071	24.7782	25.0569	23.244	24.3454	24.2745	-0.992768	1.27206	0.0534491	phospholipase D alpha 1(LOC100784434)
Glyma.07G043800.2.p	28.3054	28.6556	28.57	27.5077	27.6333	27.4067	-0.994424	2.88043	0.00131697	ribosome-associated protein p40(LOC548014)
Glyma.08G211700.5.p	25.692	25.3784	25.4304	24.1563	24.7045	24.6237	-1.00543	2.16112	0.00690052	phospholipase D alpha 1(LOC100786410)
Glyma.13G280200.1.p	27.8919	27.8638	27.9214	26.7121	26.9602	26.97	-1.01159	3.52438	0.000298963	60S ribosomal protein L5(LOC100785668)
Glyma.15G178400.1.p	24.7703	24.9693	24.8558	23.6022	24.6106	23.3446	-1.01268	1.21822	0.0605035	aldehyde dehydrogenase family 7 member A1(LOC100811186)
Glyma.08G222300.1.p	23.9	24.1216	24.0275	22.8802	23.4726	22.6577	-1.01292	1.8021	0.0157724	DUF246 domain-containing protein At1g04910-like(LOC100813879)
Glyma.17G037700.1.p	27.3476	27.5413	27.6319	26.2301	26.5965	26.6407	-1.01781	2.55764	0.00276927	30S ribosomal protein S1, chloroplastic-like(LOC100812847)
Glyma.10G245200.1.p	28.4203	28.5747	28.5737	27.5532	27.5851	27.3713	-1.0197	3.5766	0.000265094	40S ribosomal protein S3a-like(LOC100818730)
Glyma.06G192500.1.p	28.0596	28.0813	27.7844	26.9454	27.01	26.9025	-1.02246	3.27866	0.000526429	40S ribosomal protein S9-2-like(LOC100790098)
Glyma.03G040300.1.p	26.7192	26.4551	26.449	25.5199	25.6779	25.3047	-1.04026	2.75537	0.00175643	non-specific lipid-transfer protein 1-like(LOC100818917)
Glyma.14G064501.1.p	28.0232	27.8949	27.9834	27.0309	26.9271	26.7757	-1.05597	3.65298	0.000222341
Glyma.05G132800.1.p	25.1154	26.4196	25.6285	24.6772	24.729	24.5747	-1.06088	1.30125	0.0499749	uncharacterized LOC100527246(LOC100527246)
Glyma.08G008800.1.p	24.6736	24.745	24.7173	23.6181	24.0574	23.2553	-1.06843	1.99499	0.010116	acyl carrier protein 1, chloroplastic-like(LOC100806925)
Glyma.09G193300.1.p	27.3738	27.1937	27.1389	26.0142	26.1927	26.283	-1.07214	3.26658	0.000541276	uncharacterized LOC100804285(LOC100804285)
Glyma.11G229500.1.p	24.325	24.4811	23.8952	22.4446	23.5705	23.468	-1.07274	1.25916	0.0550602	GDSL esterase/lipase CPRD49(LOC100499873)
Glyma.19G205000.1.p	25.4602	25.2836	24.4961	24.718	23.8269	23.4723	-1.07428	1.06407	0.0862832	uncharacterized LOC100500046(LOC100500046)
Glyma.13G357200.1.p	26.2608	26.1908	26.4695	25.235	25.3326	25.1255	-1.07601	3.32563	0.00047247	30S ribosomal protein S17, chloroplastic-like(LOC100789205)
Glyma.17G075900.1.p	27.3796	27.179	27.2481	26.1993	26.2897	26.0877	-1.07669	3.69235	0.000203074	50S ribosomal protein L10, chloroplastic-like(LOC100791748)
Glyma.15G190500.8.p	28.89	28.8346	28.8501	27.7349	27.7854	27.8114	-1.08102	5.57896	2.63656e-06	S-adenosylmethionine synthase(LOC100787994)
Glyma.04G226900.1.p	28.0441	28.1176	27.8176	27.0297	26.8576	26.8215	-1.09019	3.22307	0.00059831	uncharacterized LOC100306058(LOC100306058)
Glyma.19G052400.1.p	30.6382	30.9404	30.4666	29.6154	29.7911	29.3672	-1.09048	2.38084	0.0041606	elongation factor 1-alpha(LOC100785429)
Glyma.04G227300.1.p	26.6277	26.3779	26.1034	25.9144	25.5268	24.3898	-1.09262	1.0656	0.0859801	nascent polypeptide-associated complex subunit alpha-like protein 2(LOC100779560)
Glyma.06G236200.1.p	27.1386	27.1041	27.2675	26.229	25.9821	26.0149	-1.09473	3.54419	0.000285631	30S ribosomal protein S20, chloroplastic-like(LOC100786192)
Glyma.02G302500.1.p	24.5726	24.7719	25.1368	22.9166	24.5448	23.6893	-1.1102	1.04648	0.0898512	heat shock protein 90-2(LOC100194422)
Glyma.20G100400.1.p	25.1475	24.9165	24.5226	23.3656	24.4841	23.4046	-1.11078	1.27276	0.0533631	protease 2(LOC100820540)
Glyma.05G201100.1.p	24.1059	24.1258	24.4754	23.155	22.3503	23.8673	-1.11147	1.15052	0.0707105
Glyma.02G255500.1.p	28.0836	28.1822	27.8455	26.8942	26.8597	27.0221	-1.11176	3.24543	0.000568294	acidic ribosomal protein P0(LOC547816)
Glyma.04G002300.1.p	27.3008	27.2711	27.4848	26.2715	26.2169	26.2282	-1.11334	4.06695	8.57137e-05	50S ribosomal protein L3, chloroplastic-like(LOC100802392)
Glyma.11G043300.1.p	25.6747	25.1584	25.5702	24.3878	25.2667	23.4069	-1.11395	0.930097	0.117463	acetylornithine deacetylase-like(LOC100814676)
Glyma.11G121700.2.p	24.0622	24.473	24.4782	22.5766	23.2697	23.813	-1.11803	1.36236	0.0434155	non-symbiotic hemoglobin 1-like(LOC100809295)
Glyma.13G341500.1.p	26.9924	26.7452	26.8869	25.6914	26.0148	25.5517	-1.12219	2.71693	0.00191896	DNA-damage-repair/toleration protein DRT100-like(LOC100804739)
Glyma.01G153400.1.p	26.4788	26.9643	26.684	25.6581	25.6131	25.4815	-1.12482	2.76759	0.00170769
Glyma.15G242900.1.p	24.8155	24.8608	24.3246	22.8273	24.6338	23.1475	-1.13075	0.905979	0.124171	fatty-acid-binding protein 3, chloroplastic-like(LOC100804241)
Glyma.15G185000.1.p	24.2653	24.9627	24.8243	22.8641	23.9543	23.8403	-1.13124	1.30425	0.049631	50S ribosomal protein L18, chloroplastic(LOC100778569)
Glyma.17G049800.1.p	29.433	29.4396	29.3456	27.8813	28.4001	28.5339	-1.13432	2.31136	0.00488242	auxin-binding protein ABP19a-like(LOC100800387)
Glyma.14G011600.1.p	26.4493	26.1048	26.2213	25.7152	24.7085	24.9472	-1.13483	1.62159	0.0239007	heat shock cognate protein 80(LOC100807416)
Glyma.07G092900.2.p	24.862	24.4715	25.2289	22.9221	23.5018	24.7195	-1.13967	0.929606	0.117596	uncharacterized LOC100527642(LOC100527642)
Glyma.16G189100.1.p	27.5193	27.4458	27.3679	26.2077	26.4395	26.2576	-1.14272	3.79418	0.000160628	50S ribosomal protein L6, chloroplastic-like(LOC100801236)
Glyma.20G160500.2.p	24.6664	24.5884	24.2736	22.8946	22.987	24.181	-1.1552	1.25707	0.0553257	60S ribosomal protein L36-3(LOC100796037)
Glyma.18G222200.1.p	27.103	26.9438	26.9725	25.9463	25.8884	25.712	-1.15753	3.75779	0.000174667	fasciclin-like arabinogalactan protein 10(LOC100780407)
Glyma.12G028300.1.p	26.6506	26.6345	26.8464	25.4091	25.6505	25.5922	-1.15991	3.50721	0.00031102	delta(24)-sterol reductase(LOC100814521)
Glyma.12G041300.1.p	27.3527	27.2894	27.1519	26.1116	26.3441	25.8563	-1.16067	2.79263	0.00161203	uncharacterized LOC100499810(LOC100499810)
Glyma.08G346500.1.p	27.8993	27.7854	27.9016	26.6371	27.0051	26.4361	-1.16935	2.62156	0.00239022	40S ribosomal protein S8-like(LOC100813170)
Glyma.06G109300.1.p	25.6727	26.2455	26.0536	24.8414	24.9115	24.6803	-1.17953	2.537	0.00290399	uncharacterized LOC100499902(LOC100499902)
Glyma.13G238200.1.p	24.317	24.1827	24.3689	22.5369	23.0724	23.72	-1.17977	1.56613	0.0271566	eukaryotic translation initiation factor 3 subunit D-like(LOC100802805)
Glyma.19G189600.1.p	27.2489	26.9814	27.0351	26.1144	25.633	25.9757	-1.18076	2.69768	0.00200594	uncharacterized LOC100499720(LOC100499720)
Glyma.11G151300.1.p	26.4727	26.358	26.5401	24.9313	25.254	25.6413	-1.18137	2.29379	0.00508407	50S ribosomal protein L27, chloroplastic-like(LOC100801145)
Glyma.09G134600.1.p	27.4257	27.3622	27.5446	26.455	26.0554	26.2695	-1.18418	3.13012	0.000741098	BAHD acyltransferase DCR-like(LOC100818158)
Glyma.02G138800.4.p	24.9679	24.4435	24.6075	23.0629	23.086	24.312	-1.18601	1.26295	0.0545819	mitogen-activated protein kinase 2(MAPK2)
Glyma.09G024000.1.p	26.6319	26.388	26.4857	25.6287	25.2856	25.0167	-1.19151	2.47526	0.00334762	uncharacterized LOC100499978(LOC100499978)
Glyma.10G223450.1.p	27.4407	27.3733	27.5412	26.3624	26.0959	26.3152	-1.1939	3.6281	0.000235452
Glyma.11G103700.1.p	27.2595	26.9971	27.0757	25.5904	26.1434	26.0013	-1.19907	2.55096	0.00281214	60S ribosomal protein L7a(LOC100792324)
Glyma.10G069800.1.p	24.2565	24.2849	24.6794	22.9712	24.1195	22.5121	-1.20601	1.14091	0.0722915
Glyma.11G099300.1.p	27.7173	27.6962	27.9135	26.5836	26.5993	26.5127	-1.21043	4.08441	8.23366e-05	50S ribosomal protein L12, chloroplastic-like(LOC100779891)
Glyma.16G068900.1.p	27.4323	27.4682	27.4093	25.9878	26.3087	26.375	-1.21279	3.25748	0.000552738	GDSL esterase/lipase At5g14450(LOC100805853)
Glyma.18G151800.2.p	24.3725	24.6535	24.2626	22.8476	23.42	23.3515	-1.22316	2.32859	0.00469251	ribosomal protein S6(RPS6)
Glyma.19G090000.1.p	24.8256	24.6398	24.4873	23.566	22.9476	23.7562	-1.22761	2.02089	0.00953038	uncharacterized LOC100780245(LOC100780245)
Glyma.11G105900.3.p	25.954	26.0283	25.8503	23.7645	25.2401	25.1166	-1.23716	1.22245	0.0599166	cold shock protein 2-like(LOC100799708)
Glyma.11G227900.1.p	25.1804	24.805	24.5517	23.1896	23.2482	24.3842	-1.23837	1.34792	0.0448833	eukaryotic translation initiation factor 3 subunit F-like(LOC100790913)
Glyma.16G028500.1.p	24.5142	24.3988	24.2803	23.3446	22.636	23.4534	-1.25311	2.04017	0.00911649	uncharacterized LOC100799633(LOC100799633)
Glyma.08G074700.1.p	24.9788	24.6736	25.3381	22.7603	24.2862	24.1581	-1.26198	1.13034	0.0740732	beta-xylosidase/alpha-L-arabinofuranosidase 2(LOC100786744)
Glyma.11G192500.1.p	26.6518	27	26.3508	25.3	25.5201	25.3941	-1.26285	2.50764	0.00310715	uncharacterized LOC100500279(LOC100500279)
Glyma.15G051500.1.p	25.1511	25.1969	25.2136	24.4324	24.1343	23.1834	-1.2705	1.55185	0.0280642
Glyma.18G284200.1.p	24.5377	24.3028	24.5803	23.0359	23.0784	23.4945	-1.27067	2.76784	0.0017067	eukaryotic translation initiation factor 3 subunit H(LOC100814297)
Glyma.10G153900.1.p	24.4643	24.1687	24.3857	24.2315	22.5126	22.4477	-1.27562	1.01341	0.0969603	probable linoleate 9S-lipoxygenase 5(LOC100802887)
Glyma.16G089000.1.p	29.4585	29.7712	29.5495	28.5512	28.2628	28.0942	-1.29031	2.86533	0.00136355	1-deoxy-D-xylulose 5-phosphate reductoisomerase, chloroplastic(DXR2)
Glyma.13G045800.1.p	24.4287	24.6196	24.6394	23.1226	23.3143	23.3661	-1.29489	3.68799	0.00020512	uncharacterized LOC100500684(LOC100500684)
Glyma.05G184000.1.p	27.0655	27.115	27.1096	25.3874	26.3778	25.609	-1.30525	1.91302	0.0122174
Glyma.15G001400.1.p	24.1897	23.4685	23.9641	22.8648	23.0927	21.7433	-1.30715	1.30764	0.0492452	uncharacterized protein At1g04910(LOC100789772)
Glyma.17G021400.2.p	25.0245	24.9763	25.2797	23.4532	24.8957	22.9998	-1.31058	1.06324	0.0864481	uncharacterized LOC100788041(LOC100788041)
Glyma.08G283700.6.p	26.8553	26.4323	27.3469	25.5348	25.7278	25.4375	-1.31147	2.03848	0.00915212	alpha-glucan water dikinase, chloroplastic(LOC100802675)
Glyma.14G220000.1.p	24.1092	24.0336	24.3074	23.1324	22.2757	23.0807	-1.32045	1.98788	0.0102829	synaptotagmin-2-like(LOC100778906)
Glyma.03G206400.6.p	24.6816	25.0252	24.863	22.5667	23.4511	24.5889	-1.32105	1.04536	0.0900821	eukaryotic translation initiation factor 3 subunit C-like(LOC100805203)
Glyma.03G073752.1.p	24.0229	24.5228	24.2608	23.6494	22.1649	23.0008	-1.3305	1.3707	0.042589
Glyma.18G237400.1.p	28.0514	27.9233	28.0713	26.5956	26.7685	26.6879	-1.33134	4.39251	4.05028e-05	50S ribosomal protein L5, chloroplastic-like(LOC100818896)
Glyma.01G201000.1.p	25.5746	25.9797	26.399	25.1495	24.6731	24.1218	-1.33629	1.60847	0.024634	uncharacterized LOC100306424(LOC100306424)
Glyma.03G132700.1.p	31.3716	31.3276	31.2792	29.9354	29.9512	30.0695	-1.34082	4.93891	1.15103e-05	beta-1,3-endoglucanase(LOC547822)
Glyma.16G129700.1.p	27.2904	27.3199	27.0148	25.7573	25.9426	25.8992	-1.342	3.55421	0.000279117	60S ribosomal protein L8-3-like(LOC100802137)
Glyma.16G199200.2.p	24.8381	24.7307	24.6633	24.7446	22.4929	22.9365	-1.35269	0.91471	0.1217	sorbitol dehydrogenase(LOC100820630)
Glyma.06G186400.1.p	24.1048	23.8082	23.984	22.6732	22.198	22.9181	-1.36927	2.41055	0.00388554	mannose-1-phosphate guanyltransferase alpha-B-like(LOC100817201)
Glyma.07G162900.1.p	26.4115	25.669	25.9025	23.8957	24.7862	25.175	-1.37531	1.45922	0.0347364	allene oxide synthase, chloroplastic-like(CYP74A1)
Glyma.03G110100.1.p	27.6957	27.4178	27.4687	26.5946	25.8427	26.0026	-1.38075	2.31735	0.00481564	50S ribosomal protein L4, chloroplastic-like(LOC100790380)
Glyma.10G076400.1.p	23.6885	24.8458	24.6525	22.2879	23.5342	23.2151	-1.38318	1.25455	0.0556486	40S ribosomal protein S17-like(LOC100785402)
Glyma.17G109500.1.p	24.1775	24.1647	24.6813	22.4488	23.85	22.5615	-1.38777	1.35005	0.0446628	synaptotagmin-5-like(LOC100797374)
Glyma.17G039100.1.p	25.4369	25.4971	25.1761	24.779	22.668	24.4809	-1.39405	0.979663	0.104794	S-adenosylmethionine synthase-like(LOC100777009)
Glyma.05G050100.1.p	24.4034	25.0579	25.0515	23.5063	24.1234	22.6781	-1.40164	1.38654	0.0410639	protein HOTHEAD(LOC100796752)
Glyma.19G235100.1.p	25.0591	24.9366	24.9374	22.9179	24.7433	23.042	-1.40998	1.12333	0.0752786	probable Xaa-Pro aminopeptidase P(LOC100779551)
Glyma.04G092600.1.p	25.3786	25.1635	25.6447	24.92	24.4629	22.5707	-1.41105	0.898472	0.126336	14-3-3-like protein B(LOC547890)
Glyma.19G220200.1.p	24.7355	25.0098	24.6565	23.1707	23.0107	23.9764	-1.41464	1.95123	0.0111885	S-adenosylmethionine synthase 1(LOC100777770)
Glyma.20G171600.1.p	24.1007	23.9869	23.2942	21.7565	22.1766	23.1953	-1.41777	1.33732	0.0459918	ras-related protein Rab7(LOC100785104)
Glyma.08G239900.3.p	26.756	26.4975	26.8317	25.9865	25.9505	23.8798	-1.42281	0.94609	0.113217	patellin-3(LOC100806382)
Glyma.08G300700.7.p	24.5665	24.2009	23.9883	22.3174	22.8414	23.3233	-1.42456	1.87736	0.013263	probable methyltransferase PMT2(LOC100796104)
Glyma.10G106100.3.p	24.8561	25.3461	25.1036	23.107	24.9823	22.9373	-1.4264	0.998099	0.100439	eukaryotic translation initiation factor 3 subunit E(LOC100788418)
Glyma.14G223000.5.p	27.3193	27.3289	27.411	25.8813	26.0279	25.847	-1.43436	4.66619	2.15681e-05	L-ascorbate oxidase homolog(LOC100812416)
Glyma.17G243800.1.p	25.06	24.3266	24.6481	23.223	23.4356	23.059	-1.43909	2.41912	0.00380961	26S proteasome non-ATPase regulatory subunit 14 homolog(LOC100817264)
Glyma.12G241100.1.p	24.6498	24.8667	24.9193	22.9009	22.9362	24.265	-1.44453	1.46816	0.0340284	quinone oxidoreductase 1(LOC100793768)
Glyma.03G086400.1.p	26.0917	26.0291	26.218	24.5507	24.6729	24.7799	-1.44512	4.12515	7.49637e-05	40S ribosomal protein S8(LOC100794937)
Glyma.09G198900.1.p	24.8424	24.581	24.3871	22.0219	23.7799	23.642	-1.45553	1.18061	0.065976	dirigent protein 19-like(LOC100817263)
Glyma.02G091200.1.p	24.9589	25.2887	25.0764	23.5394	24.9797	22.3537	-1.48371	0.904578	0.124572	ATP-dependent Clp protease proteolytic subunit 3, chloroplastic(LOC100778609)
Glyma.05G152100.2.p	25.555	25.6647	25.9685	24.9327	25.1257	22.6686	-1.48705	0.866383	0.136025	serine hydroxymethyltransferase 1-like(LOC100815417)
Glyma.13G255800.1.p	24.8589	25.2139	25.3028	24.0659	24.0507	22.7874	-1.49053	1.54445	0.0285463	anthocyanidin 3-O-glucosyltransferase 7-like(LOC100807224)
Glyma.09G069800.2.p	24.9262	24.9304	25.1864	23.5313	23.9203	23.101	-1.4968	2.39642	0.00401402	thiol protease aleurain-like(LOC547734)
Glyma.11G005800.8.p	24.8266	24.6272	24.1792	24.2799	22.4877	22.341	-1.50812	1.08742	0.081768	cysteine synthase(LOC547631)
Glyma.10G090100.1.p	25.9939	26.5451	25.8299	24.5281	24.7571	24.5519	-1.5106	2.56853	0.00270063	uncharacterized LOC100804119(LOC100804119)
Glyma.10G106600.1.p	27.2078	26.798	27.0988	26.0934	24.2632	26.2155	-1.5108	1.10455	0.0786052	beta-glucosidase BoGH3B(LOC547729)
Glyma.03G253500.3.p	24.2806	24.7598	24.6544	22.9664	23.3909	22.7676	-1.52333	2.53904	0.00289043	violaxanthin de-epoxidase, chloroplastic-like(LOC100816085)
Glyma.03G086100.1.p	25.2861	25.7693	25.6634	24.0679	22.825	25.2518	-1.52469	0.999102	0.100207	uncharacterized LOC100305479(LOC100305479)
Glyma.18G232000.3.p	24.706	24.2106	24.4028	23.1919	22.6593	22.8769	-1.5304	2.71385	0.00193264	acyl-CoA thioesterase 2-like(LOC100805018)
Glyma.11G152400.1.p	25.3886	24.8677	25.469	24.9174	22.9158	23.2589	-1.54443	1.12414	0.0751382	uncharacterized LOC100526972(LOC100526972)
Glyma.11G002400.1.p	25.4522	25.2809	25.1015	23.2254	23.4137	24.5173	-1.55943	1.70147	0.0198851	40S ribosomal protein S20-2-like(LOC100803623)
Glyma.02G276600.1.p	25.7966	25.3467	25.7667	22.6421	24.7317	24.8089	-1.57572	1.02104	0.0952717	uncharacterized LOC100500082(LOC100500082)
Glyma.10G216700.1.p	25.2299	25.1039	25.5708	23.2013	23.9574	23.9947	-1.5837	2.24252	0.00572106	uncharacterized LOC100527321(LOC100527321)
Glyma.12G172500.1.p	27.6933	27.6536	27.3405	26.2855	26.1328	25.4674	-1.60052	2.36363	0.00432885	aquaporin PIP2-7(LOC732604)
Glyma.12G009600.1.p	28.1163	28.0172	28.0304	26.1906	26.7471	26.4179	-1.60277	3.20629	0.000621891	50S ribosomal protein L1, chloroplastic-like(LOC100819124)
Glyma.15G255900.1.p	24.9376	24.9461	24.8975	22.7786	24.3959	22.6988	-1.63597	1.38046	0.0416425	eukaryotic translation initiation factor 2 subunit 3-like(LOC100784099)
Glyma.15G271300.1.p	25.9411	26.0395	25.9223	24.8085	25.3922	22.7878	-1.63808	0.971541	0.106772	60S ribosomal protein L6(LOC100784101)
Glyma.06G156400.1.p	24.1771	24.5063	24.5346	23.0567	23.3949	21.8085	-1.65262	1.53707	0.0290353	ultraviolet-B receptor UVR8(LOC100776580)
Glyma.18G205800.1.p	28.4585	29.1435	28.8638	27.5593	26.6866	27.22	-1.6666	2.17597	0.0066686	ferritin light chain(FERRITIN)
Glyma.08G138200.2.p	25.5479	25.7575	25.9004	24.1868	24.5173	23.4931	-1.66956	2.19754	0.00634535	inositol-3-phosphate synthase(MIPS4)
Glyma.01G227000.2.p	25.4423	25.3275	25.5105	22.4658	23.4055	25.3648	-1.68141	0.917796	0.120838	beta-adaptin-like protein C(LOC100777522)
Glyma.08G131400.4.p	26.1985	25.7208	26.6811	23.0981	25.2776	25.1714	-1.68441	1.03866	0.0914829	uncharacterized LOC100802840(LOC100802840)
Glyma.05G243400.3.p	24.8991	25.0501	24.6662	23.2875	22.6225	23.602	-1.70117	2.27208	0.00534463
Glyma.07G073800.4.p	25.0476	25.4231	25.3136	22.6652	24.6289	23.3859	-1.70145	1.3607	0.0435814	(+)-neomenthol dehydrogenase(LOC100804943)
Glyma.18G211000.1.p	25.9887	25.6697	25.5944	24.3884	24.7154	22.9266	-1.74078	1.43754	0.0365138	cationic peroxidase 1-like(LOC100799162)
Glyma.05G203000.1.p	24.7611	24.8905	24.7744	23.317	22.3398	23.4616	-1.76921	2.12176	0.00755518
Glyma.10G058200.1.p	25.9882	26.3055	26.7251	25.2321	23.6538	24.8058	-1.77568	1.5768	0.026497	phenylalanine ammonia-lyase 2(PAL2)
Glyma.18G113100.2.p	25.679	26.0951	25.2804	22.4509	25.0759	24.1691	-1.7862	1.04245	0.0906879	spermidine hydroxycinnamoyl transferase-like(LOC100778626)
Glyma.17G236800.1.p	24.9614	25.0017	25.3652	24.0272	22.9653	22.9762	-1.78652	2.05228	0.00886574	subtilisin-like protease SBT1.7(LOC100799654)
Glyma.13G327000.1.p	24.8601	24.5122	25.1018	22.9478	23.1332	23.0223	-1.79027	3.24681	0.000566491	beta-galactosidase 8-like(LOC100804036)
Glyma.08G086600.1.p	26.5692	26.8055	26.6513	25.7889	23.0564	25.7891	-1.7972	0.91891	0.120529	ATP-dependent zinc metalloprotease FTSH 2, chloroplastic-like(LOC100816354)
Glyma.08G048200.1.p	26.7082	26.6371	26.6905	23.0872	25.6762	25.8731	-1.79977	0.937342	0.11552	40S ribosomal protein S16-like(LOC100816874)
Glyma.10G262400.1.p	25.3757	25.3031	25.6335	25.4956	22.5097	22.8973	-1.80326	0.891666	0.128332	probable cinnamyl alcohol dehydrogenase(LOC100777558)
Glyma.06G061300.1.p	25.6229	24.7402	25.0901	22.5236	22.9093	24.6101	-1.80339	1.22695	0.0592989	transmembrane 9 superfamily member 8(LOC100804029)
Glyma.11G191200.1.p	25.0502	24.6613	24.9358	22.8364	22.5598	23.8357	-1.80516	1.95379	0.0111226	serine carboxypeptidase-like 51(LOC100808412)
Glyma.03G230600.1.p	24.7088	24.7053	25.0944	22.0769	22.5462	24.4402	-1.81508	1.1631	0.068691	uncharacterized LOC100306660(LOC100306660)
Glyma.06G307100.1.p	26.6859	26.5435	26.41	25.1139	25.9986	23.0778	-1.81641	0.980336	0.104632	L-ascorbate oxidase homolog(LOC100797670)
Glyma.06G073600.1.p	24.9766	25.3987	25.462	22.1415	25.3349	22.8231	-1.84595	0.87427	0.133577	psbP domain-containing protein 5, chloroplastic-like(LOC100809891)
Glyma.17G085400.1.p	26.5975	26.5207	26.4512	23.3573	25.0209	25.6091	-1.86073	1.29109	0.0511579	60S ribosomal protein L27a(LOC100305936)
Glyma.03G151900.1.p	26.3216	26.2244	26.1823	23.1266	24.9042	25.0797	-1.87263	1.39652	0.040131	basic 7S globulin-like(LOC100800584)
Glyma.06G189900.1.p	25.1918	25.0465	25.3087	23.0181	23.9809	22.911	-1.879	2.24208	0.00572687	ATPase 11, plasma membrane-type-like(LOC100782459)
Glyma.05G136800.1.p	24.8566	24.6673	25.1232	23.2542	22.7195	23.0293	-1.88133	3.11645	0.000764804	transmembrane 9 superfamily member 3(LOC100813819)
Glyma.09G096700.2.p	24.7147	24.1812	24.7861	22.9505	22.9766	22.0978	-1.88571	2.25887	0.00550971	transmembrane 9 superfamily member 11-like(LOC100805158)
Glyma.04G222400.1.p	26.629	26.6691	26.4835	22.5446	25.8719	25.6641	-1.90031	0.816457	0.152596	chalcone isomerase 4B(LOC778027)
Glyma.14G152900.1.p	25.6967	25.714	25.9568	23.0426	22.6924	25.9207	-1.90392	0.862836	0.13714	uncharacterized LOC100527027(LOC100527027)
Glyma.16G007700.1.p	26.5935	27.0316	26.3134	24.903	23.4969	25.8036	-1.91167	1.27557	0.0530193	auxin-binding protein ABP19a-like(LOC100816355)
Glyma.03G172200.3.p	25.8437	25.7751	25.6887	23.3481	25.105	23.0549	-1.93317	1.40396	0.0394493	eukaryotic translation initiation factor 3 subunit A-like(LOC100803796)
Glyma.05G041900.2.p	24.5913	24.682	24.8573	22.7945	23.1261	22.4058	-1.93473	3.01768	0.000960108	elongation factor Tu, chloroplastic(LOC100791320)
Glyma.06G231500.1.p	25.9024	26.4046	26.2018	25.669	23.8553	23.1391	-1.94845	1.1943	0.0639291	malate dehydrogenase, mitochondrial-like(LOC100777296)
Glyma.11G226800.1.p	25.0376	26.1293	25.3332	25.0945	22.1397	23.3956	-1.95673	1.00195	0.0995514	60S ribosomal protein L32-1(LOC100787561)
Glyma.08G337500.1.p	24.614	24.8263	24.5355	23.8593	22.1855	22.0389	-1.964	1.53475	0.0291912	DNA damage-inducible protein 1-like(LOC100779464)
Glyma.20G009400.1.p	25.4073	25.3973	25.8308	25.3568	22.9613	22.4112	-1.96872	1.0091	0.097926	probable N-acetyl-gamma-glutamyl-phosphate reductase, chloroplastic(LOC100801527)
Glyma.10G010800.4.p	25.2709	25.256	25.2908	23.5203	23.5546	22.8281	-1.97161	2.94367	0.00113849	long chain acyl-CoA synthetase 1-like(LOC100790536)
Glyma.09G077600.1.p	25.154	25.2616	24.9089	22.6545	23.5493	23.1964	-1.97477	2.66933	0.00214127	uncharacterized LOC100306308(LOC100306308)
Glyma.01G207700.3.p	26.8275	27.0342	26.8758	25.2054	23.4734	26.0945	-1.98812	1.21001	0.061658	uncharacterized LOC100305473(LOC100305473)
Glyma.07G069700.3.p	24.6792	24.9633	25.2827	22.96	23.2884	22.6527	-2.00804	2.86421	0.00136707	probable glycerol-3-phosphate acyltransferase 8(LOC100794137)
Glyma.14G072400.3.p	25.0538	25.4184	25.2747	23.5358	23.4081	22.726	-2.02563	2.75534	0.00175656	50S ribosomal protein L31, chloroplastic-like(LOC100782305)
Glyma.09G139200.1.p	25.7495	25.7036	25.2882	22.3557	24.0965	24.1279	-2.05373	1.56498	0.0272283	uncharacterized LOC100500457(LOC100500457)
Glyma.17G012300.1.p	26.4037	25.9606	26.4104	24.3147	24.8173	23.4605	-2.06075	2.08541	0.00821461	L-ascorbate oxidase homolog(LOC100819758)
Glyma.09G210000.1.p	26.6554	26.7344	26.9641	23.4694	23.4988	27.0142	-2.12382	0.834566	0.146364	26S proteasome non-ATPase regulatory subunit 13-like(LOC100804455)
Glyma.11G090900.1.p	24.5709	24.6644	24.5608	22.7549	22.152	22.5176	-2.12386	3.54454	0.000285402	ABC transporter E family member 2(LOC100797423)
Glyma.09G274500.5.p	25.5709	25.3527	25.8526	22.8759	24.347	23.1433	-2.13669	1.9651	0.0108369	protein FATTY ACID EXPORT 3, chloroplastic-like(LOC100808188)
Glyma.16G070900.1.p	24.9666	24.666	25.1399	23.0297	23.114	22.1587	-2.15665	2.52223	0.00300448	glycine-rich RNA-binding protein 3, mitochondrial(LOC100813165)
Glyma.11G146800.1.p	25.4186	25.5223	25.6023	23.4167	22.8683	23.7865	-2.15724	2.86395	0.00136789	protein disulfide isomerase-like 1-4(LOC100790223)
Glyma.12G044500.2.p	25.2773	25.329	25.4503	23.121	23.0578	23.391	-2.16228	4.33711	4.60139e-05	ATP-dependent Clp protease proteolytic subunit 6, chloroplastic-like(LOC100796744)
Glyma.02G016900.1.p	25.658	25.878	25.529	22.6231	23.8341	24.0197	-2.19599	2.08961	0.00813566	uncharacterized LOC100500410(LOC100500410)
Glyma.07G103000.5.p	24.67	24.9885	24.957	22.4826	23.287	22.1632	-2.22755	2.50818	0.00310326	uncharacterized LOC100779987(LOC100779987)
Glyma.16G150300.1.p	25.5832	25.5275	25.79	22.8946	23.9655	23.3061	-2.24481	2.6527	0.00222484
Glyma.03G185900.1.p	26.3524	26.7729	26.203	25.2931	23.66	23.5838	-2.26385	1.74967	0.0177965	nodulin-26(LOC547967)
Glyma.17G166400.1.p	26.8707	25.476	26.792	21.9096	25.2374	25.1037	-2.296	0.909787	0.123087	40S ribosomal protein S26-1(LOC100781822)
Glyma.18G005800.1.p	25.6485	25.7952	26.4178	23.0941	24.1018	23.7721	-2.29785	2.4277	0.00373504	uncharacterized LOC100305718(LOC100305718)
Glyma.02G238700.7.p	25.7178	26.044	25.8484	25.4701	22.1724	23.0285	-2.31306	1.0958	0.0802056	uncharacterized LOC100306364(LOC100306364)
Glyma.05G187700.3.p	25.7334	25.0855	25.6813	25.1208	22.2455	22.1748	-2.31972	1.09908	0.0796009
Glyma.01G205400.2.p	25.941	25.8232	26.134	23.8545	24.9109	22.0884	-2.3481	1.32685	0.0471144	uncharacterized LOC100500328(LOC100500328)
Glyma.10G202400.1.p	25.4095	25.1693	25.3861	22.74	23.793	22.3081	-2.37464	2.21724	0.00606399	cytochrome P450 77A3-like(LOC100793522)
Glyma.12G095800.1.p	26.0417	25.5566	25.7397	24.4094	22.3907	23.3579	-2.39329	1.78871	0.0162664	uncharacterized LOC100500058(LOC100500058)
Glyma.05G152200.2.p	25.378	24.8806	25.2209	23.0729	21.8905	23.3101	-2.40202	2.18261	0.00656741	subtilisin-like protease SBT5.3(LOC100794807)
Glyma.13G217100.1.p	26.0421	26.2317	25.5911	25.1251	22.1511	23.3708	-2.40595	1.27684	0.0528636	uncharacterized LOC100500108(LOC100500108)
Glyma.10G280700.5.p	25.0587	25.1157	25.4767	23.369	21.9488	23.0145	-2.4396	2.26348	0.00545161	protein transport protein Sec24-like At4g32640(LOC100797752)
Glyma.20G116100.1.p	27.089	27.4581	27.099	24.7158	25.1807	24.3544	-2.46506	3.10881	0.000778379	uncharacterized LOC100306183(LOC100306183)
Glyma.06G118550.1.p	24.9541	24.8887	24.8662	22.2832	22.4709	22.5588	-2.46537	5.06599	8.59035e-06
Glyma.14G061100.1.p	25.8445	25.9756	26.6879	23.219	24.651	23.2344	-2.46788	1.98246	0.0104121	60S acidic ribosomal protein P0-like(LOC100777482)
Glyma.11G096400.8.p	25.7088	26.1883	26.2224	23.7588	21.707	25.1483	-2.50183	1.16113	0.0690028	myosin-2-like(LOC100801514)
Glyma.20G123600.1.p	25.7321	25.8192	26.0291	24.1277	23.4152	22.4675	-2.52334	2.1745	0.0066911	ATP synthase subunit beta, mitochondrial(LOC100789705)
Glyma.06G178300.1.p	25.0291	25.0235	24.7493	22.4585	21.8363	22.9363	-2.52361	2.79609	0.00159922	60S ribosomal protein L27a-3-like(LOC100798197)
Glyma.03G088900.1.p	25.8446	26.0089	25.9936	24.415	22.7991	22.9965	-2.54547	2.11791	0.00762237	AIR12(LOC100305350)
Glyma.05G157300.1.p	25.5078	25.1631	25.294	22.0199	23.0494	23.0744	-2.60704	2.70707	0.00196305	tubulin A(LOC732582)
Glyma.13G137100.2.p	26.5043	26.5737	26.4494	23.5086	22.1242	26.0702	-2.60818	1.05985	0.0871271	uncharacterized LOC100500013(LOC100500013)
Glyma.18G287600.1.p	26.2048	26.2918	26.1738	22.8249	25.6842	22.2927	-2.62285	1.17045	0.0675387	ras-related protein RABE1c(LOC100782753)
Glyma.18G196000.2.p	25.7682	25.6034	25.8403	22.353	23.0538	23.8262	-2.65964	2.45495	0.00350793	carboxyl transferase alpha subunit(ACCA-3)
Glyma.13G088000.1.p	25.6702	25.6968	25.5715	22.8969	22.883	23.0878	-2.69027	5.414	3.85479e-06	probable beta-D-xylosidase 7(LOC100812757)
Glyma.12G039900.1.p	26.1601	26.5272	25.7215	23.2246	23.4384	23.5062	-2.74653	3.42346	0.000377169	uncharacterized LOC100500153(LOC100500153)
Glyma.19G113000.1.p	27.2663	27.1463	27.2845	26.8971	22.9483	23.5489	-2.76762	1.05799	0.0875012	tubulin alpha-6 chain(LOC100796371)
Glyma.19G105100.1.p	25.9028	26.314	25.8895	22.4229	22.2481	25.0937	-2.78052	1.39248	0.0405058	chalcone synthase J-like(LOC100775264)
Glyma.03G050100.1.p	29.9728	29.8928	30.0683	27.2356	27.247	27.0818	-2.78983	5.5398	2.88535e-06	ferritin-2, chloroplastic(LOC100778273)
Glyma.01G106100.1.p	25.8519	26.0044	26.1484	22.3314	24.4918	22.8012	-2.79347	1.87127	0.0134503	uncharacterized LOC100306119(LOC100306119)
Glyma.01G124500.1.p	27.3126	27.7416	27.5555	25.2841	24.0991	24.7504	-2.82533	2.8262	0.0014921	ferritin(SFERH-2)
Glyma.18G011600.1.p	25.9297	26.0699	26.1886	23.6159	22.8032	23.2776	-2.83051	3.47838	0.000332372	estradiol 17-beta-dehydrogenase 12-like(LOC100817128)
Glyma.12G055900.4.p	25.6526	26.0508	26.453	23.3488	22.7616	23.4997	-2.84877	3.0419	0.000908023	uncharacterized LOC100783150(LOC100783150)
Glyma.12G192800.1.p	25.636	25.6394	25.8521	22.3492	24.1538	22.05	-2.85819	1.90637	0.012406	L-ascorbate oxidase homolog(LOC100791301)
Glyma.08G321100.1.p	29.4086	29.8958	29.5969	27.0918	26.2645	26.5978	-2.98241	3.36219	0.000434321	protein ASPARTIC PROTEASE IN GUARD CELL 2(LOC100796818)
Glyma.13G285600.1.p	25.5977	25.9942	25.6869	23.636	21.5535	23.0436	-3.01524	2.05618	0.00878657	uncharacterized LOC100306643(LOC100306643)
Glyma.04G065600.1.p	26.2537	25.6718	25.9919	22.0247	23.6929	22.8137	-3.12874	2.44521	0.00358748	uncharacterized LOC100526941(LOC100526941)
Glyma.06G175400.1.p	27.3338	26.8519	27.0073	23.6582	23.8663	23.98	-3.22946	4.34018	4.56895e-05	31 kDa ribonucleoprotein, chloroplastic-like(LOC100790280)
Glyma.07G057200.1.p	25.4464	25.9417	25.8101	22.2446	23.0401	22.1287	-3.26162	3.26937	0.000537817	rhodanese-like domain-containing protein 4, chloroplastic(LOC100810796)
Glyma.03G252700.1.p	26.3236	26.0346	26.336	22.7674	23.4396	22.6089	-3.29275	3.56704	0.000270996	GDSL esterase/lipase At5g33370-like(LOC100813414)
Glyma.13G177900.1.p	26.0665	26.1198	26.1621	22.3171	22.648	23.2882	-3.36506	3.52289	0.000299994	30S ribosomal protein S5, chloroplastic-like(LOC100820232)
Glyma.17G230700.2.p	26.1182	26.3393	26.207	22.2596	23.736	22.496	-3.39095	2.73527	0.00183961	vacuolar-processing enzyme(LOC100784318)
Glyma.16G068000.1.p	28.4128	28.0992	27.972	23.6564	27.1315	22.592	-3.70138	1.26152	0.0547619	elongation factor 1-alpha(LOC100801611)
Glyma.10G221600.1.p	28.245	28.4437	28.5578	23.3264	23.0046	27.7727	-3.71423	1.13334	0.0735638	uncharacterized LOC100306646(LOC100306646)
Glyma.04G228400.1.p	26.1053	26.3876	25.908	22.9047	20.697	23.6466	-3.71749	1.84437	0.0143097	30S ribosomal protein 1, chloroplastic-like(LOC100784915)
Glyma.06G170900.1.p	27.2449	26.7421	27.3009	22.4255	23.401	22.9786	-4.16098	3.62365	0.000237877	elongation factor 1-delta(LOC100777627)
